# Supplementary material for: Effects of visual inputs on neural dynamics for coding of location and running speed in medial entorhinal cortex
Source: eLife. 2020 Dec 10;9:e62500. doi: 10.7554/eLife.62500 (PMC7773338; doi:10.7554/eLife.62500)
Supplement: Figure 4—source data 1. [file elife-62500-fig4-data1.xlsx]

## Sheet: Sheet1
Cell #	Modulation by darkness	Mean firing rate during light	Mean firing rate during dark	Mean of speed tuning curve during light	Mean of speed tuning curve during dark
1	negative	61.4358	57.4617	68.4928	60.8506
2	negative	56.0266	43.5169	61.7926	46.0808
3	negative	0.654902	0.443259	0.802676	0.496755
4	negative	55.3175	39.1335	66.8788	44.053
5	negative	0.548251	0.315781	0.51878	0.344265
6	negative	0.515756	0.361606	0.705548	0.443696
7	negative	23.7367	18.7371	27.8615	20.0974
8	negative	10.8882	8.35305	11.9129	8.6329
9	negative	1.67614	1.2046	2.03241	1.34656
10	negative	1.64115	1.31456	1.84317	1.44422
11	negative	0.41522	0.244984	0.75876	0.31342
12	negative	0.412443	0.181099	0.383055	0.17113
13	negative	0.455512	0.205533	0.61737	0.225964
14	negative	0.477404	0.240326	0.539172	0.233193
15	negative	1.06101	0.522164	0.930592	0.451419
16	negative	0.34838	0.0952275	0.375073	0.0993494
17	negative	0.763419	0.370594	0.985653	0.400943
18	negative	1.85617	1.49348	1.88813	1.33391
19	negative	1.0438	0.662719	1.10413	0.591555
20	negative	1.06656	0.435612	1.22648	0.528736
21	negative	1.23809	0.803789	1.24861	0.794525
22	negative	0.661724	0.344924	0.487388	0.277937
23	negative	0.595064	0.384454	0.674497	0.4698
24	negative	0.964194	0.591204	1.10275	0.615616
25	negative	6.07142	3.73738	6.27612	4.02205
26	negative	2.35177	1.28096	2.34244	1.33167
27	negative	1.95661	1.29749	2.10372	1.31184
28	negative	0.913512	0.451919	0.926504	0.449873
29	negative	3.15367	2.47433	3.13089	2.69241
30	negative	1.9641	1.13003	1.92623	1.16247
31	negative	0.992763	0.459473	0.993194	0.499583
32	negative	1.3507	0.905965	1.41823	1.05403
33	negative	2.91321	1.94026	2.55444	1.96105
34	negative	2.14821	1.74028	2.55996	1.89566
35	negative	4.27843	3.13486	4.73274	3.29442
36	negative	1.89617	1.33111	1.97693	1.43639
37	negative	4.07651	3.52651	4.3465	3.53628
38	negative	1.50314	0.922756	1.85667	1.13562
39	negative	0.903089	0.62136	1.02447	0.697089
40	negative	0.744374	0.366626	0.765303	0.362589
41	negative	14.6034	10.5552	15.9235	10.779
42	negative	1.52393	0.692702	1.63911	0.645526
43	negative	0.83696	0.363003	1.03806	0.353286
44	negative	0.83246	0.381704	1.08906	0.438867
45	negative	0.361077	0.194423	0.470182	0.22465
46	negative	1.00308	0.659451	1.30612	0.767374
47	negative	3.76313	2.47988	4.89472	2.87699
48	negative	2.70371	1.32842	3.46039	1.35459
49	negative	2.43707	1.37207	2.85766	1.57751
50	negative	1.24671	0.696748	1.24259	0.739287
51	negative	0.838809	0.338058	1.06488	0.418573
52	negative	2.69218	1.76479	2.76886	1.66153
53	negative	1.30291	0.723249	1.40716	0.673985
54	negative	5.76608	3.23112	5.27658	3.34666
55	negative	3.87229	2.92792	3.84227	2.75344
56	negative	1.86138	1.22533	1.95798	1.33085
57	negative	0.866578	0.58188	1.19097	0.639701
58	negative	1.82358	0.714208	1.81859	0.965117
59	negative	1.13761	0.676945	1.0479	0.705536
60	negative	0.60786	0.215039	0.557276	0.293242
61	negative	2.50373	1.7133	2.70493	2.12277
62	negative	0.435673	0.14919	0.586566	0.162567
63	negative	1.89744	1.41651	1.8861	1.10859
64	negative	2.30534	0.719761	2.49104	1.22126
65	negative	1.76015	1.23399	1.65214	1.28072
66	negative	1.55303	1.16416	1.66689	1.17818
67	negative	0.610259	0.179345	0.659815	0.207456
68	negative	0.651525	0.388052	0.738797	0.390721
69	negative	3.0997	1.51301	3.50212	1.78579
70	negative	4.28848	2.58781	4.30583	2.77613
71	negative	2.61562	1.76171	3.14596	1.94773
72	negative	1.95537	1.33715	2.11439	1.28576
73	negative	0.691204	0.375355	0.956056	0.438386
74	negative	1.63476	0.96894	1.6667	0.988779
75	negative	6.38749	4.15271	6.23593	4.40284
76	negative	15.277	13.6564	14.553	13.3441
77	negative	7.93718	6.85234	7.66568	7.22446
78	negative	0.488211	0.311584	0.537604	0.356578
79	negative	9.04524	3.31495	8.68749	3.41866
80	negative	0.527728	0.361071	0.652771	0.374285
81	negative	0.522966	0.159506	0.624931	0.137549
82	negative	3.8654	2.54452	3.87841	2.81577
83	negative	5.64442	3.44325	6.60357	4.64782
84	negative	1.54878	1.09804	1.54157	1.23628
85	negative	1.42214	1.05055	1.43969	0.897663
86	negative	0.661501	0.54902	0.57488	0.52305
87	negative	3.59743	2.24607	3.27125	2.78687
88	negative	1.51296	1.1147	2.01306	1.42308
89	negative	0.865617	0.732305	0.92961	0.866417
90	negative	10.1436	8.37179	10.7981	8.29819
91	negative	0.658911	0.443751	0.824388	0.451528
92	negative	6.37099	4.8111	6.92178	4.92167
93	negative	6.5367	4.69541	7.52937	5.30592
94	negative	4.62968	3.16582	4.17182	3.19763
95	negative	2.66683	1.02389	3.16297	1.10566
96	negative	1.41131	0.991402	1.4653	1.14266
97	negative	1.09389	0.982238	1.10686	0.950787
98	negative	1.11056	0.596508	1.18429	0.589838
99	negative	0.823961	0.377399	0.884159	0.413184
100	negative	1.7354	1.41796	1.95651	1.4902
101	negative	6.96576	5.37273	7.6736	6.10921
102	negative	0.929768	0.554019	1.02438	0.575381
103	negative	4.68883	3.04835	4.99117	3.24275
104	negative	0.836458	0.309917	0.926661	0.369485
105	negative	3.3175	2.41935	3.55133	2.52263
106	negative	0.714821	0.530692	0.813162	0.582236
107	negative	0.632342	0.396561	0.678496	0.437065
108	negative	1.8787	1.42295	1.19999	1.0727
109	negative	8.3979	6.22001	8.58126	6.45135
110	negative	1.40881	1.02639	1.48207	1.13765
111	negative	0.178289	0.108304	0.211057	0.107878
112	negative	0.498209	0.312417	0.52568	0.293885
113	negative	24.4547	21.87	26.4858	23.1408
114	negative	1.37382	1.07638	1.4561	1.07241
115	negative	0.444889	0.316582	0.469036	0.33936
116	negative	2.06964	1.3189	2.35403	1.46746
117	negative	5.74787	3.66467	5.72108	3.85692
118	negative	3.5449	2.09501	4.17315	2.19966
119	negative	3.09494	2.36878	3.22129	2.35433
120	negative	3.10648	1.32252	3.8089	1.70777
121	negative	2.90929	1.11804	3.41527	1.33129
122	negative	2.07748	1.47313	2.36708	1.54134
123	negative	1.78825	0.741905	2.33552	0.825158
124	negative	2.04277	0.470179	2.78533	0.575746
125	negative	0.731332	0.393088	0.976704	0.50519
126	negative	3.88376	2.6378	4.40551	2.91413
127	negative	0.834841	0.35631	1.08801	0.341123
128	negative	1.08482	0.453124	1.36507	0.34647
129	negative	4.36149	3.48374	5.21682	4.11751
130	negative	0.784052	0.353135	1.13208	0.449823
131	negative	1.54353	0.62073	1.88172	0.688477
132	negative	2.72412	2.25163	2.75374	2.30813
133	negative	0.383907	0.0929118	0.520249	0.0936354
134	negative	1.97606	1.49377	2.52877	1.59741
135	negative	4.44248	3.58344	5.37598	4.17347
136	negative	1.14433	0.972619	1.1513	1.0095
137	negative	3.08619	2.53543	3.18362	2.6604
138	negative	0.487251	0.324964	0.883043	0.391457
139	negative	2.64499	2.01686	2.98389	2.42761
140	positive	1.68317	3.3782	1.83598	3.13355
141	positive	1.11656	1.60141	1.18975	1.58744
142	positive	0.968955	1.59427	1.05838	1.32171
143	positive	43.9053	50.2706	43.7149	49.9811
144	positive	0.205695	0.353115	0.233412	0.359711
145	positive	2.16963	3.95353	2.00829	3.86378
146	positive	0.741993	1.12845	0.933613	1.18437
147	positive	1.5681	2.09739	1.47837	2.2289
148	positive	0.599149	1.23954	0.838462	1.6016
149	positive	5.04634	6.42151	5.49802	6.66854
150	positive	1.71888	2.43306	2.41271	3.0088
151	positive	0.136495	0.25394	0.179821	0.29652
152	positive	3.09517	4.66196	4.08006	5.24625
153	positive	0.181463	0.322186	0.215653	0.334616
154	positive	2.67428	3.71543	3.38934	4.01706
155	positive	3.09732	3.89401	3.75358	4.33407
156	positive	3.65203	4.21223	3.89329	4.45896
157	positive	1.62293	2.31772	1.62708	1.95043
158	positive	4.33892	8.87847	5.89249	7.88359
159	positive	3.59327	5.66932	4.80854	5.71971
160	positive	1.90952	2.97587	2.08888	2.88351
161	positive	1.24885	2.38853	1.47633	2.25292
162	positive	2.54103	3.18915	2.9441	3.16169
163	positive	1.53712	2.68512	1.75974	2.85028
164	positive	1.76729	3.27424	2.50875	3.69502
165	positive	0.387565	0.49384	0.444742	0.491563
166	positive	0.638828	0.811815	0.895349	0.956964
167	positive	5.91928	7.64121	7.01085	8.63032
168	positive	1.69428	2.38624	2.45934	2.91809
169	positive	1.81173	2.7243	1.92774	2.99751
170	positive	0.613618	0.932676	0.841339	1.18796
171	positive	0.249875	0.277945	0.255236	0.294859
