# Supplementary material for: Effects of visual inputs on neural dynamics for coding of location and running speed in medial entorhinal cortex
Source: eLife. 2020 Dec 10;9:e62500. doi: 10.7554/eLife.62500 (PMC7773338; doi:10.7554/eLife.62500)
Supplement: Figure 5—source data 1. [file elife-62500-fig5-data1.xlsx]

## Sheet: SpeedResponseCurves_light
Cell #/Speed bins (cm/s)	0-2	2-4	4-6	6-8	8-10	10-12	12-14	14-16	16-18	18-20	20-22	22-24	24-26	26-28	28-30	30-32	32-34	34-36	36-38	38-40	40-42	42-44	44-46	46-48	48-50
1	4.76231	4.58923	4.67709	4.54395	4.33509	3.83713	4.00945	3.66665	3.87473	3.70362	3.5259	3.84339	3.58441	3.51887	3.73524	3.26764	3.49673	3.36097	3.27975	3.71443	3.90997	4.06759	4.14507	3.82075	4.0083
2	3.07643	2.82123	2.30476	1.84552	1.69397	1.6083	1.57663	1.54649	1.51936	1.50218	1.46062	1.60098	1.57025	1.56877	1.60005	1.64671	1.64649	1.45895	1.37979	1.54909	1.60613	1.70977	1.88396	2.15952	2.27099
3	0.727286	0.484747	0.491903	0.450943	0.386122	0.341524	0.301724	0.259916	0.230507	0.208301	0.190715	0.176309	0.166913	0.158024	0.152268	0.146362	0.142542	0.140607	0.140059	0.140532	0.139529	0.137319	0.13642	0.135811	0.135639
4	0.727286	0.484747	0.491903	0.450943	0.386122	0.341524	0.301724	0.259916	0.230507	0.208301	0.190715	0.176309	0.166913	0.158024	0.152268	0.146362	0.142542	0.140607	0.140059	0.140532	0.139529	0.137319	0.13642	0.135811	0.135639
5	1.6249	1.8054	1.68612	1.5194	1.46977	1.45565	1.34578	1.40413	1.38347	1.2867	1.26168	1.4602	1.36108	1.33483	1.27308	1.37266	1.36363	1.3248	1.27455	1.19912	1.19166	1.25608	1.36811	1.43797	1.36247
6	6.686	5.40308	5.30614	4.74749	3.88815	3.15409	2.58821	1.89479	1.33358	0.89856	0.711889	0.565254	0.433361	0.327542	0.267945	0.232558	0.207421	0.18997	0.180422	0.172919	0.168392	0.165262	0.163084	0.16161	0.160869
7	9.10266	6.61382	4.93341	5.4199	4.56489	3.79027	3.22707	2.38106	1.92333	1.67449	1.27569	1.02075	0.875619	0.771856	0.688851	0.573083	0.481832	0.422141	0.383325	0.356853	0.335558	0.319827	0.311932	0.310196	0.307052
8	7.18788	6.60763	5.32177	4.95628	4.60204	3.91256	3.42992	2.95179	2.19639	1.47023	1.04095	0.759558	0.594423	0.512116	0.472723	0.44335	0.423768	0.393878	0.371702	0.36099	0.361003	0.350739	0.34658	0.341289	0.338849
9	9.92908	8.17853	7.67286	6.65781	6.13283	5.06092	4.287	2.84853	2.34567	1.85077	1.36987	0.962755	0.766395	0.567859	0.457579	0.376338	0.321201	0.275548	0.241578	0.219362	0.203124	0.193812	0.188867	0.183814	0.181708
10	3.31312	2.64471	2.65379	2.31125	2.05475	1.85342	1.76139	1.40873	1.06897	0.914801	0.709761	0.51482	0.397198	0.311419	0.257681	0.233276	0.209558	0.197177	0.189632	0.181092	0.176017	0.172604	0.170354	0.168796	0.168006
11	15.8972	15.2128	14.971	14.9911	13.4558	13.8863	13.6618	11.6911	12.2822	11.9433	12.2773	11.571	11.463	12.0799	11.8636	12.0332	11.1567	11.4672	10.944	9.64314	9.80491	9.02346	9.59172	10.3035	10.3516
12	3.00498	2.79306	2.15513	1.91384	1.82726	1.68168	1.58552	1.43012	1.19815	0.895001	0.826172	0.780554	0.707956	0.62868	0.570704	0.526303	0.489195	0.466342	0.450189	0.439294	0.430905	0.424373	0.418764	0.414359	0.412204
13	3.57943	3.17562	2.99587	3.12589	3.34971	3.48022	3.53254	3.36202	3.53067	3.56925	3.40162	3.50719	3.57542	3.79997	3.44774	3.60087	3.54105	3.7121	3.38818	3.58873	3.26687	3.41634	3.51589	4.00657	3.72779
14	1.70614	2.22165	2.12834	1.99955	1.93021	1.83645	1.799	1.63189	1.556	1.45061	1.45591	1.31496	1.28634	1.1669	1.09826	1.05368	1.08218	1.14769	1.15455	1.13882	1.17638	1.19712	1.24824	1.27049	1.32423
15	27.8193	31.7506	31.6601	30.563	29.4407	26.981	24.1247	23.0975	22.3613	21.6071	20.8021	19.7403	18.4598	18.5002	17.1284	15.5047	15.6398	15.7026	16.8063	16.2176	15.8465	16.579	16.3108	17.7079	16.1125
16	31.5114	36.9848	36.4833	34.343	31.8596	30.3164	29.2658	27.4002	25.6018	22.8461	22.0392	21.6557	19.9299	19.0281	18.6323	17.5181	19.3112	18.7297	16.3046	16.5191	14.0516	12.6274	13.1477	13.7955	13.8238
17	3.12783	2.62772	2.50978	2.58453	2.42865	2.32583	2.29855	2.34246	2.10869	2.0327	1.99904	2.10789	2.14885	2.08715	2.21775	2.19553	1.9008	1.73291	1.66324	1.66923	1.70131	1.71977	1.67239	1.65886	1.64227
18	2.10422	2.17235	2.4727	2.46071	2.24224	2.26563	2.19904	2.01128	1.96902	1.77326	1.799	1.8912	1.95048	1.87206	1.77842	1.86338	1.77951	1.70975	1.51657	1.39415	1.32631	1.27675	1.25865	1.25775	1.24973
19	2.45346	2.89733	3.5835	3.90984	3.85538	3.34648	3.48096	3.74789	3.62437	3.62654	3.48731	3.1347	3.26653	3.6481	3.91881	4.05449	4.17271	4.42353	4.33213	3.97844	3.94338	3.76161	3.51934	3.47169	3.35573
20	1.96294	2.05541	2.30394	2.38685	2.23536	2.28308	2.22576	2.27609	2.45024	2.45949	2.24746	2.07292	2.17388	2.25601	2.3061	2.17901	2.35066	2.08989	1.81216	1.7408	1.79025	1.80501	1.84208	1.80989	1.82564
21	3.00166	3.41015	4.06791	4.13784	4.41344	4.56629	4.678	4.40815	4.15402	3.82578	3.21581	3.42144	3.33361	2.95775	2.98058	2.70314	2.75529	2.54409	2.20786	1.89879	1.76826	1.55155	1.35742	1.40044	1.33494
22	20.3662	23.1505	26.162	27.4111	26.3804	26.044	25.0089	25.781	25.7749	23.9146	25.5785	25.3983	24.4564	22.7797	23.3914	22.4956	22.0975	21.4519	24.6359	22.8993	22.0988	19.0675	17.2016	16.9201	15.4357
23	2.25995	2.61281	2.69671	3.22104	3.11884	3.44051	3.22151	3.28919	3.50447	3.48624	3.00364	3.31197	3.30998	3.18862	3.30574	3.16302	2.9188	2.8035	2.74984	2.75825	2.42994	2.2259	2.12987	2.12512	2.14931
24	6.49817	8.87967	9.85476	10.0908	9.76414	10.2325	10.2325	10.9365	10.6307	11.3233	10.6153	11.4244	11.2546	10.7424	11.0742	11.1796	11.5807	11.8401	11.2505	10.9387	9.51921	9.13844	8.92231	8.91297	8.97802
25	3.2353	3.79244	4.23796	4.46442	5.06157	4.73848	4.90822	4.74682	4.52411	4.65369	4.13592	4.21871	4.33076	3.90495	3.95848	3.85347	4.09842	3.87546	3.81217	3.75669	3.48412	3.75032	3.93642	3.96111	4.02624
26	1.08061	1.25816	1.46541	1.71587	1.70306	1.6445	1.84961	1.81376	2.05129	2.13368	2.11775	1.99391	1.84991	1.90329	1.85584	1.72841	1.48344	1.42748	1.46664	1.45615	1.31975	1.22558	1.16212	1.14036	1.1233
27	18.5832	20.8427	22.5464	24.2083	27.3915	27.5596	27.9627	30.2868	30.2623	29.0571	28.5059	30.5207	26.7399	26.1577	26.8666	27.3558	26.9859	25.1284	24.9551	24.0382	26.0246	25.6636	25.3258	25.5384	25.4283
28	3.80623	4.0917	4.00366	4.19255	4.12798	4.27109	3.76952	4.24102	5.14791	4.66194	4.50713	4.89056	4.90173	4.45239	5.17026	5.12455	4.42739	5.01608	4.57679	4.47287	4.81418	5.12366	5.49161	5.82268	5.86701
29	11.652	14.9418	18.0659	19.613	20.9948	21.0868	22.4125	22.0643	20.8891	20.9342	20.3941	18.9	20.6356	18.1593	19.4148	18.9728	18.397	20.3241	21.3406	22.632	21.1281	19.9953	19.7856	19.7053	19.8708
30	0.953717	1.26265	1.62621	1.60598	1.52147	1.55585	1.85998	1.87093	1.76146	1.90585	1.89667	1.96982	2.00901	2.01937	2.1995	2.14233	1.98883	1.80566	1.70903	1.69861	1.79984	1.8604	1.93802	2.15291	2.18834
31	1.19582	1.28886	1.45722	1.39899	1.55797	1.71651	1.89538	2.01147	2.19062	2.19375	2.03111	2.33041	2.2367	2.30612	2.27408	2.54414	2.41955	2.13025	2.0992	2.15172	2.24244	2.35685	2.45334	2.65472	2.71292
32	7.69073	10.8989	13.1365	14.7745	15.0814	14.4553	15.2372	15.3715	15.5077	15.9698	14.4578	16.1591	14.3827	14.2714	13.7884	14.0276	14.8604	13.968	13.3722	13.3935	14.2667	13.0932	12.4223	12.4677	12.1357
33	0.8964	1.05076	1.16276	1.21417	1.21379	1.43468	1.36171	1.31489	1.35409	1.56342	1.65558	1.45224	1.42736	1.43328	1.64003	1.74167	1.67841	1.52576	1.60214	1.51946	1.4008	1.32796	1.30869	1.43804	1.35424
34	0.975336	1.03299	1.04294	1.06438	1.104	1.16058	1.18422	1.24699	1.24406	1.33483	1.32347	1.16438	1.21022	1.2649	1.22227	1.24334	1.3683	1.35164	1.23679	1.23614	1.18484	1.13215	1.10892	1.06245	1.00647
35	15.0048	16.9555	19.031	21.7647	23.2272	23.8483	24.8172	26.9888	29.8654	31.3001	33.6755	31.8073	34.312	36.9984	38.8271	37.2241	38.9591	42.5184	42.2661	40.2917	31.9894	26.6522	24.275	24.0483	23.6599
36	9.68353	10.7996	11.0344	11.0423	12.1381	11.6889	11.746	12.2085	13.0856	12.7614	12.5998	12.0951	14.5203	14.4457	14.7286	15.4633	13.0008	12.3364	13.052	11.8458	11.7915	11.3007	11.3262	11.5263	11.996
37	0.872218	1.16911	1.31707	1.52516	1.48206	1.50204	1.38799	1.64088	1.72153	1.87755	1.98756	2.26115	2.12987	2.07638	1.9057	1.77447	1.84079	1.78483	1.73353	1.63915	1.53602	1.52871	1.4753	1.46227	1.4815
38	15.3067	18.2759	20.1652	21.2967	23.3788	24.6821	25.1918	26.1781	25.7624	26.1916	27.3505	26.2535	27.8386	28.9908	29.2386	26.885	25.1193	24.6804	27.0526	30.1325	29.2815	27.8467	30.761	29.2934	26.7247
39	20.6176	24.211	26.3943	27.6191	29.0994	31.5362	31.1301	31.1746	32.8799	33.7529	34.732	33.8079	33.1308	30.1217	32.242	32.968	31.8725	28.9009	29.2855	31.9025	33.0721	35.6232	36.1196	36.4429	36.6694
40	4.36956	4.22394	4.81759	4.83224	4.91971	5.84995	5.80614	5.98382	5.5661	6.06864	5.82314	6.25965	6.60907	7.1964	6.6345	6.43446	5.7588	5.43502	5.59526	5.96891	5.96033	5.84086	5.56719	5.55583	5.66077
41	1.49483	1.72763	2.0919	2.54834	2.81786	3.55168	3.70967	3.69465	3.91893	4.08505	3.84132	3.52809	3.72267	3.70174	3.47228	3.23433	3.04557	2.93405	2.89362	2.88694	2.88706	2.88715	2.88718	2.88732	2.88717
42	10.1009	10.3928	11.03	11.7533	13.2197	13.1546	13.6246	14.9212	15.089	15.7444	15.999	15.681	16.0103	16.0776	15.6511	15.2578	15.9285	14.9403	13.7818	13.7966	12.9126	14.052	14.4271	15.3819	16.1469
43	0.649136	0.978473	1.21655	1.27319	1.35578	1.44297	1.33453	1.39092	1.4276	1.45074	1.47729	1.47994	1.40562	1.43536	1.49569	1.51689	1.50719	1.49387	1.4799	1.4766	1.47668	1.47673	1.47679	1.4768	1.4768
44	21.3952	28.887	33.8718	34.7337	38.0202	39.2689	38.3672	38.4367	38.6161	39.7161	39.2753	38.0273	38.2891	38.7007	39.4212	38.4355	37.5274	34.1855	34.983	35.1155	36.5489	37.441	37.9891	36.152	37.4686
45	4.47762	4.87585	5.12897	5.41337	5.28697	5.10686	5.24946	5.70867	5.35204	5.82551	6.60792	7.17987	6.63755	7.459	7.35348	6.96951	8.14317	7.70887	6.40618	5.62912	5.15401	4.88584	4.62579	4.54763	4.54764
46	1.18901	1.34155	1.70426	2.04185	2.03551	2.58562	2.76265	3.51439	3.14712	3.11046	2.86645	2.59096	2.48436	2.60442	2.80104	2.78953	2.89825	2.7884	2.70464	2.63544	2.56803	2.5117	2.51168	2.51167	2.51164
47	1.3576	1.32337	1.46978	1.46606	1.86711	2.24636	2.08923	2.09308	2.03268	2.34941	2.61903	2.89442	3.02541	3.05286	3.16015	3.15255	3.10576	3.29101	3.43745	3.19582	3.19921	2.96134	2.80197	2.73037	2.67006
48	0.903971	0.97868	0.982954	1.03692	1.03935	1.08045	1.09856	1.25191	1.42085	1.56941	1.39703	1.32853	1.37054	1.46971	1.44518	1.50197	1.44845	1.45701	1.4045	1.3357	1.35144	1.33778	1.32585	1.29181	1.28912
49	1.36526	1.4962	1.7014	1.88963	2.11682	2.14996	2.36813	2.26147	2.21022	2.2565	2.07455	2.03859	2.28652	2.40772	2.2995	2.25767	2.00285	1.91546	1.9025	1.75574	1.67731	1.61436	1.59967	1.59032	1.59032
50	1.1815	1.23103	1.20604	1.36018	1.37506	1.47818	1.64014	1.69628	1.67914	1.55817	1.52351	1.60575	1.60259	1.5744	1.461	1.45767	1.51336	1.52607	1.65284	1.61873	1.46187	1.37769	1.36558	1.35252	1.35365
51	1.34619	1.61929	1.68479	1.65286	1.63229	1.87577	2.12227	2.17781	2.43967	2.14706	2.51721	2.69069	2.70369	2.74954	2.59749	2.2426	2.07738	1.98376	1.80929	1.86152	1.91357	1.84322	1.80192	1.62251	1.54166
52	1.09389	1.17825	1.41104	1.58846	1.51317	1.62282	1.9051	2.20126	2.10422	2.37249	2.3374	2.09925	2.09351	2.15411	2.25443	2.28234	2.30128	2.34218	2.25675	2.05746	1.99752	1.95107	1.89348	1.86642	1.84377
53	4.96968	6.73438	7.44262	8.61852	8.99471	9.28537	9.9951	11.8351	11.0467	10.7426	10.0585	10.6199	12.5176	12.9324	11.2456	11.9288	13.606	11.6618	10.9458	12.594	14.2278	11.1059	10.218	11.1875	11.5414
54	4.8096	4.83692	5.2765	5.53709	6.31055	6.76666	7.48338	8.23571	9.09396	8.88933	10.2612	10.9578	10.1066	10.1694	10.0825	10.5062	11.5871	11.0904	10.8926	10.4759	9.76874	9.60319	9.78926	9.96269	9.1653
55	2.59429	3.21964	3.30068	3.47943	3.81427	4.72692	4.76245	5.19793	4.71804	4.6226	4.23212	4.82795	5.14803	5.43184	5.51259	5.29561	5.48901	5.66297	5.61104	4.62685	4.31651	4.30151	4.40462	4.50735	4.5698
56	5.4075	5.996	6.11942	6.01561	6.08782	7.38801	7.11038	7.4672	7.13908	7.50112	6.97336	7.44927	8.29083	6.76876	5.96206	6.68715	6.74224	7.4654	7.5959	6.78169	6.65708	6.9273	6.51992	6.33406	6.1522
57	1.81818	2.2707	2.53723	2.86026	2.94792	3.95806	4.25011	5.04549	5.19472	5.77304	5.58203	5.52386	5.6908	5.64067	5.82824	7.15202	7.09975	7.95913	7.5249	7.64293	7.86696	7.42486	7.96522	7.81136	7.13078
58	1.18825	1.35543	1.64339	2.05267	2.06482	2.11485	2.16759	2.26744	2.27715	2.56147	2.3834	2.2961	2.31728	2.12079	2.28856	2.474	2.32774	2.18429	2.52735	2.11317	2.15227	2.00951	1.87978	1.86147	1.86414
59	0.610041	0.73268	0.825331	0.882442	1.02336	1.08628	1.22453	1.29724	1.31726	1.20044	1.18443	1.20025	1.3221	1.42306	1.45473	1.42031	1.52679	1.52344	1.5132	1.52064	1.51247	1.47813	1.41277	1.37269	1.30994
60	1.69447	1.93183	2.23132	2.2985	2.73506	2.60802	3.03019	2.96903	3.09594	2.82493	2.9784	2.78936	2.49272	3.03034	3.59405	3.70792	3.81251	4.32045	4.67703	4.53449	3.90665	3.59325	3.4757	3.47567	3.47567
61	22.1223	22.2767	22.5479	22.8086	24.5971	25.8583	27.3786	27.4541	28.1226	30.072	31.1768	29.4658	30.8133	31.3085	30.2907	29.7238	31.696	31.828	35.5339	32.5622	32.6545	32.2503	31.4821	31.0515	30.2947
62	0.987605	1.12198	1.32134	1.48571	1.64309	1.69578	1.73084	1.86314	1.74527	1.88247	2.06466	2.04891	1.97351	2.11413	2.24053	2.29858	2.30503	2.08019	2.04264	1.88658	1.75541	1.6904	1.66256	1.65498	1.65311
63	3.40199	3.87025	4.00964	3.93746	4.31127	4.62682	4.46522	4.75622	4.5128	4.50897	5.05431	5.4668	4.95037	5.26219	5.09186	4.43092	4.52206	4.59169	5.24222	5.02488	4.88896	4.90216	4.68867	5.16636	5.14684
64	1.24918	1.58424	1.82937	1.76668	1.77659	1.97834	2.13653	2.11926	2.27109	2.2814	2.29679	2.69946	2.93156	3.38936	2.65341	2.38456	2.30282	2.05329	1.79428	1.62999	1.61793	1.65133	1.67225	1.78527	1.75156
65	6.93141	8.32123	9.5578	9.7353	11.0678	12.0159	12.5178	13.815	13.1896	13.0755	14.4957	15.1601	15.8996	14.6066	15.5108	15.6425	16.2031	15.8378	15.7542	16.9672	16.1539	16.8714	16.6102	16.777	15.0074
66	4.72845	6.19978	7.07918	7.7733	8.04874	8.80037	8.47799	9.18061	9.81605	9.67967	9.5758	10.1322	9.95314	10.2112	10.0927	9.55466	9.24661	9.05542	9.2779	10.141	9.82525	9.41929	8.72898	8.65117	8.65114
67	1.37197	1.84967	2.08504	2.42713	2.43766	2.62	2.46911	2.46938	2.65451	2.93732	2.89022	2.92204	2.98387	2.97742	2.70516	2.53369	2.50405	2.39398	2.23483	2.20171	2.2329	2.21898	2.21899	2.219	2.21902
68	2.59766	2.62581	2.96195	3.34354	3.13018	3.15206	3.64371	3.82055	3.91837	4.18342	4.32142	4.34273	4.24489	4.2919	4.54115	4.83748	5.77653	5.62248	5.26034	4.93278	4.73916	4.51876	4.13158	4.17794	4.16112
69	9.8145	10.7547	11.8614	12.0257	13.4333	13.7045	14.0797	14.2099	14.0918	14.5967	14.269	13.5933	14.3269	14.2352	15.6866	13.7672	15.5221	15.3231	15.8159	16.632	16.2964	15.5041	14.906	12.9988	12.3065
70	4.55428	4.43653	4.68727	5.36184	6.17954	6.80953	6.96166	7.52915	7.94695	8.25738	8.4871	8.98432	9.06668	9.52089	10.3747	8.74923	8.76852	8.44319	9.92777	10.2676	10.0896	10.5644	8.97166	8.20879	8.94724
71	0.752396	0.801509	0.868132	1.07812	1.29076	1.30262	1.6157	1.88711	2.05706	2.00667	2.04187	2.16711	2.04976	2.14952	2.11023	2.11847	2.24337	2.16432	2.24624	2.10025	1.97917	1.9136	1.86444	1.83937	1.8283
72	3.36243	3.74683	4.44299	4.34692	4.55932	5.29322	5.35633	5.44384	5.75972	5.96227	6.74708	6.29119	7.09515	5.84663	5.68492	5.42178	5.35097	5.48272	5.21476	5.82298	5.75898	5.81077	5.58682	5.2442	5.06209
73	0.286481	0.325746	0.487024	0.633162	0.761167	0.845511	0.99035	1.16442	1.21737	1.39053	1.59373	2.03727	2.1183	1.74469	1.69189	1.81946	1.96378	1.9972	2.15058	2.25869	2.19487	2.01892	2.02359	2.00428	1.96242
74	3.66415	4.44932	4.41982	4.38232	4.5885	4.63008	4.82889	4.87263	5.17769	5.14576	5.20017	4.82773	4.93431	4.73218	4.92307	5.47218	5.04974	4.84105	4.95128	5.04981	5.06	5.12081	5.467	5.01731	4.66575
75	2.70435	2.54492	2.67953	2.80214	2.74152	3.15473	2.9526	3.05349	3.68394	3.79291	4.43775	4.33306	5.0058	5.17322	5.3496	6.39582	7.08172	7.49734	7.34385	6.37264	6.54937	5.74104	5.02605	4.76433	4.86579
76	1.39616	1.2224	1.21413	1.24193	1.36857	1.5307	1.73591	1.87081	1.9983	2.37582	2.50431	2.75154	2.8704	3.05026	3.18032	3.04616	3.08184	2.74419	2.60577	2.60237	2.68662	2.67549	2.96356	3.06266	3.18073
77	2.83949	2.71505	3.34635	3.69118	4.18652	4.6194	4.7328	5.45065	6.30082	6.21564	6.40872	6.85285	7.19763	8.20187	9.34296	8.37745	7.77564	7.12067	6.81584	7.21169	8.0415	9.08826	8.85965	8.36593	8.61317
78	0.599872	0.629856	0.648872	0.806152	1.10841	1.2416	1.2849	1.47513	1.69563	1.93407	2	2.01673	1.94423	1.88879	2.01189	1.98088	1.83259	1.97917	2.17325	2.20079	2.32367	2.26448	2.37713	2.37723	2.27076
79	2.05623	2.06396	2.25505	2.44497	2.64296	3.14685	3.52492	3.7795	4.12185	3.46865	3.25888	3.35577	3.40616	3.88418	3.65688	3.89502	4.49324	4.157	4.40751	4.49146	4.17165	4.09373	4.10124	3.90473	3.94351
80	1.16585	1.262	1.43411	1.59241	1.85812	1.97734	1.98372	2.3108	2.28407	2.56472	2.74543	2.54221	2.77258	3.0754	3.22604	3.21333	2.9633	2.69997	2.78796	2.70745	2.44424	2.21953	2.07143	2.01223	2.05263
81	1.58044	1.70285	2.20001	2.30814	2.26161	2.85687	3.0262	3.43763	3.18261	3.42143	3.38336	3.59907	4.19585	4.65099	4.69404	4.52794	4.77075	3.95033	3.99412	3.80839	3.99456	4.18436	4.26563	4.8152	4.86473
82	0.686785	0.750949	0.779401	0.816832	0.892773	1.00205	1.20571	1.49765	1.80159	2.08356	2.16888	2.5155	2.07827	2.17405	2.16269	2.07713	2.21066	2.39488	2.56503	2.68551	2.77479	2.77099	2.72033	2.6477	2.64619
83	4.065	2.89945	3.03142	3.24251	4.03546	4.21793	4.8715	5.36863	5.61574	5.88388	5.73078	8.06392	7.79614	8.51432	7.28631	7.71935	7.81912	7.9371	7.37823	6.75043	6.01642	5.66148	5.61647	6.03016	6.18222
84	3.38495	4.79718	5.87437	6.41109	7.28042	7.7268	8.77121	8.78183	9.25757	9.82687	10.6942	10.7253	10.8419	10.6629	9.66014	8.88224	8.76593	8.24629	8.37897	8.54126	8.69428	9.24854	9.20361	9.13135	9.13135
85	1.30172	1.16405	1.24896	1.38439	1.48543	1.77801	1.88437	2.04067	2.09447	1.86605	1.87358	1.95623	2.52327	2.65435	2.76454	2.62504	2.71045	2.89207	2.78551	2.958	3.21847	3.21147	3.62509	3.93157	3.71534
86	0.677944	0.719247	0.752099	0.787379	0.860089	1.00493	1.13236	1.30145	1.1551	1.21254	1.13671	1.17314	1.14205	1.26415	1.18786	1.22696	1.23164	1.28671	1.26828	1.23854	1.18699	1.175	1.18291	1.1829	1.1829
87	5.10296	6.58379	7.1058	7.14408	7.49899	8.51985	8.4914	8.60134	9.01978	9.14781	9.4914	10.2422	10.9467	10.9811	11.1081	10.6748	11.1034	11.8729	11.572	12.0995	11.725	12.3451	13.4942	14.6407	14.6197
88	3.52752	3.6797	3.74153	4.41227	4.96587	5.58938	5.75719	5.95286	6.09124	6.00871	5.84485	5.41262	5.19584	5.52667	6.00398	6.07564	5.33344	6.03322	6.1538	6.22217	6.07469	6.14816	6.71684	6.58108	6.63942
89	2.01453	1.93488	1.89906	2.49213	2.74068	3.28624	3.55462	3.44815	3.60117	3.78363	4.51616	4.75464	4.25213	4.35265	5.04936	5.34946	5.51225	4.57787	4.57146	4.38035	4.3916	4.58609	4.96802	5.40883	5.54492
90	3.94538	3.63238	3.24501	3.58538	3.54737	3.71923	4.11297	4.33004	4.52968	4.01414	4.01671	4.95373	4.74468	5.26816	5.63727	6.42886	5.94833	6.30578	6.57156	6.48613	7.23248	7.36439	6.87368	6.43452	6.53302
91	1.31146	1.25804	1.23318	1.41817	1.53683	1.66695	1.73024	1.80276	1.98663	2.00262	2.06522	2.36504	2.16909	2.03195	1.87502	1.85012	2.04747	2.24111	2.25047	2.13363	2.0559	2.12542	2.14212	2.21144	2.18384
92	1.01228	1.17379	1.40573	1.42577	1.51743	1.7259	1.82603	1.99254	2.15753	2.41658	2.41335	2.56139	2.67328	2.78628	2.92677	2.82845	2.94424	2.99209	3.08262	3.26087	3.43153	3.39411	3.38787	3.34814	3.33596
93	4.24578	3.16805	3.35723	3.83811	4.10616	3.79071	4.08915	4.01145	4.28937	4.27699	4.56817	5.28098	4.76839	5.49196	6.08327	6.19349	5.9686	6.03347	6.55819	6.48997	7.44787	6.42906	6.38826	6.5065	6.96376
94	19.8638	19.1632	19.0364	19.6213	20.7291	20.8013	22.8342	23.4323	23.7721	25.424	25.3515	27.5101	27.3371	28.0384	28.8928	28.244	29.4849	29.1784	29.8221	29.1062	28.2056	28.5533	27.2064	25.7638	27.4101
95	0.638346	0.83452	1.00436	1.21137	1.23944	1.20885	1.21557	1.17212	1.08009	1.19201	1.08399	0.996271	0.981499	1.05935	1.11884	1.15577	1.2317	1.28208	1.24446	1.26251	1.17571	1.10374	1.08872	1.08787	1.10043
96	2.3012	2.42192	2.23665	2.23063	2.2455	2.17663	2.21618	2.57752	2.4001	2.81308	3.12292	3.05775	3.15529	3.42076	3.68939	3.86904	4.15208	3.52802	3.23258	3.33403	3.10862	3.11401	3.42522	3.59687	3.93432
97	3.33781	3.45816	3.94385	3.91861	4.39564	4.84435	5.06763	5.56546	5.85894	5.72804	5.55837	5.81701	6.57289	6.18085	5.45121	5.2738	4.92919	5.59713	6.58984	5.98972	5.38724	5.33846	5.46085	5.1919	5.96635
98	5.23905	13.6442	16.8206	20.3477	22.7313	23.8347	24.8044	27.32	26.4048	26.8141	30.1022	30.5893	29.2802	30.4422	28.8044	31.117	31.4135	36.0327	35.6167	33.8849	35.9873	38.9265	40.0022	37.378	36.2685
99	1.29617	1.47526	1.63087	1.6334	1.76007	1.85924	1.59864	1.62333	1.90715	1.96351	2.08413	2.16251	2.17454	2.10908	2.15702	2.20516	2.22894	2.40571	2.39963	2.34841	2.2149	2.16049	2.10252	2.18336	2.11457
100	1.0929	1.3085	1.50957	1.62228	1.94096	2.26852	2.23526	2.33628	2.5795	2.64742	2.85343	3.25843	3.34413	2.8367	2.34433	2.1562	2.35356	2.56119	2.74737	3.21855	3.39311	3.58247	3.77511	3.75156	3.7924
101	1.24403	1.69803	1.72833	1.87527	2.10844	2.16385	2.07095	2.11812	2.53844	3.01053	3.45761	3.63406	3.3734	3.46584	3.46902	3.59785	3.61908	3.24596	3.32139	3.50238	3.72564	4.1745	3.9561	3.95552	3.99045
102	18.9345	21.4612	22.9701	24.8158	24.8123	24.9668	25.8844	27.6285	26.9465	27.3129	26.5982	28.179	29.1169	29.0325	30.7548	30.4595	30.3941	30.3722	31.6118	31.2769	30.751	31.0149	37.3314	34	33.7659
103	1.04536	1.19004	1.28381	1.61708	1.93205	1.83388	1.69021	1.73067	1.72473	1.78664	2.21496	2.44355	2.5035	2.56057	2.52782	2.68533	3.02977	3.13682	2.94816	2.7895	2.74754	2.70128	2.68395	2.7439	2.73965
104	1.81231	2.04861	2.14135	2.22103	2.53843	2.48697	2.44516	2.49165	2.62883	2.40948	2.25665	2.27851	2.22785	2.32535	2.29725	2.51923	2.67819	2.53746	2.47871	2.33885	2.33799	2.48845	2.66228	2.50692	2.54105
105	0.943447	0.949711	0.958803	1.09021	1.11823	1.20013	1.31256	1.58589	1.61235	1.65716	1.79669	1.84965	2.22602	1.91303	2.12203	2.06727	2.16287	2.25347	2.32042	2.35431	2.08312	2.07948	2.2077	2.2043	2.32524
106	12.7569	12.1695	13.0679	13.6786	14.6706	15.922	16.3159	16.5528	16.9279	18.235	19.0426	20.9154	19.1674	19.5396	19.2218	20.2635	20.3564	22.4846	22.796	25.3305	22.3667	25.3267	23.5576	24.5849	22.2853
107	4.56298	3.98929	3.79454	3.87205	3.69967	4.24958	4.54391	4.79682	5.12717	5.35192	5.36516	5.26359	5.38228	5.66835	6.30888	6.54301	6.53858	7.12964	7.21028	6.59708	6.4658	6.74911	7.00969	6.31496	5.74307
108	3.66526	4.70256	4.74322	5.10379	5.35533	5.71661	6.05843	6.39521	7.03058	7.06605	7.27306	6.81673	6.88559	7.14458	7.20142	6.93844	6.76954	7.28592	7.52273	7.78427	7.52167	7.35039	7.58577	7.71172	7.67215
109	2.68787	2.71462	2.80527	2.70125	2.85566	2.74939	3.13561	3.12111	2.91893	2.85895	3.1172	3.04167	3.26062	3.01304	3.00789	3.129	3.01686	2.87026	2.91731	2.95145	3.05706	3.00766	3.32428	3.57333	3.46959
110	1.23026	1.24142	1.35232	1.42228	1.59641	1.75944	1.83971	2.0222	1.99146	2.14792	2.06366	2.18826	2.11639	2.08917	2.27354	2.17342	2.35179	2.29675	2.18279	2.4402	2.62005	3.19097	3.06104	3.17692	2.82019
111	1.68078	2.02886	2.28571	2.42655	2.69794	2.79587	2.81689	2.84571	3.21365	3.25465	3.57436	4.31483	4.67333	4.31189	4.62258	4.27127	4.19072	4.19363	4.24998	4.58976	4.69294	4.77921	4.97191	5.27579	5.58787
112	13.1106	14.5234	15.4098	15.6068	16.4696	16.6365	16.6214	16.8241	17.1869	17.5145	17.8691	19.2825	20.3638	18.6912	20.6066	22.3952	22.3741	22.4991	22.2599	24.2672	23.5314	24.1359	26.7487	26.2768	28.2073
113	0.690354	0.675606	0.726357	0.792822	0.861773	0.98875	1.00525	1.04785	1.12189	1.3524	1.4419	1.52975	1.48478	1.48189	1.34183	1.38226	1.40023	1.38801	1.27982	1.26316	1.31188	1.35584	1.39763	1.44087	1.45882
114	1.17529	1.00399	1.00045	1.12528	1.23129	1.40387	1.45955	1.35765	1.34934	1.50037	1.56469	1.61685	1.6361	1.69947	1.8143	1.87833	1.9119	2.0604	2.18989	2.0905	2.06991	2.19617	2.18514	2.14169	2.2249
115	2.49277	3.07504	3.1808	3.56631	4.01537	3.67202	3.87809	4.27083	4.17889	4.67795	5.53961	5.26382	4.90508	4.94011	5.39156	5.59655	5.60546	6.41139	6.93618	6.73517	6.1799	6.5971	6.19759	6.35044	6.39662
116	0.950778	1.02514	0.984625	0.951064	1.02588	0.988711	1.06316	1.08208	1.18607	1.23029	1.27118	1.27632	1.4453	1.56324	1.7464	1.88479	1.81465	1.92622	1.77587	1.69554	1.65002	1.77666	1.74992	1.72211	1.52308
117	2.24596	2.25527	2.57515	3.46512	3.4942	3.73991	4.00031	4.27105	4.68119	5.19244	4.56465	5.30802	5.25087	5.51569	5.30928	4.90918	5.81774	6.39209	5.83078	5.6095	5.53632	5.31294	5.42867	6.27988	6.67172
118	3.15203	2.74028	2.67939	2.79204	2.83321	2.84872	2.80688	3.0871	2.94868	3.07241	3.00073	3.15591	3.48938	3.78418	3.76293	3.81436	3.75298	3.61866	3.66171	3.44722	3.32662	3.26865	3.26868	3.26865	3.26877
119	0.813015	0.977945	1.1133	1.15996	1.40497	1.4847	1.38244	1.37863	1.44668	1.63208	1.76639	1.90129	2.19343	2.36924	2.36847	2.40992	2.20937	2.03471	2.01414	2.19993	2.24113	2.39135	2.58994	2.66623	2.51751
120	5.93525	6.12501	5.51161	5.84118	6.16736	6.84948	7.88039	8.05531	8.30255	8.74748	8.10476	8.38206	8.86155	9.3369	9.08726	9.70437	11.1099	10.5687	11.4154	11.8796	11.7334	11.9109	11.3559	11.392	12.084
121	1.83702	2.0053	1.9604	2.05881	2.01469	1.97496	1.86867	2.27322	2.31768	2.58665	2.7305	2.63509	2.5803	2.59621	2.58878	2.83718	3.07435	3.42294	3.10805	3.26743	2.94162	2.80856	2.6677	2.67502	2.745
122	1.61508	1.64022	1.75451	1.96535	1.94966	1.9479	1.99674	1.96984	2.24349	2.40585	2.39789	2.28241	2.37915	2.31469	2.55214	2.23539	2.21281	2.23098	2.26328	2.24815	2.25878	2.37563	2.47319	2.51019	2.3731
123	49.3076	47.3837	47.5806	47.9648	51.2235	51.2585	56.3348	58.6332	54.377	57.1483	57.1506	57.1087	58.746	61.5228	57.0869	61.663	63.9499	71.2471	71.1945	70.8323	65.5503	73.3063	76.3244	76.565	74.0113
124	0.841844	1.02978	1.30543	1.43287	1.5567	1.64086	1.67555	1.67028	1.65106	1.57075	1.60353	1.65562	1.7139	1.60686	1.48592	1.67966	1.62657	1.59113	1.66862	1.66155	1.74472	1.84478	1.93827	2.02173	2.1677
125	0.989955	0.958776	1.10285	1.16601	1.19784	1.147	1.2282	1.14169	1.28292	1.40002	1.50312	1.65143	1.55219	1.50458	1.53394	1.59911	1.58104	1.61402	1.74382	1.88112	1.99571	2.05098	2.12199	1.92231	1.96103
126	51.8459	41.519	43.7818	48.1692	52.8793	58.2012	62.9517	64.9292	70.0954	71.312	72.7957	79.4044	79.9854	79.7651	84.1298	82.482	86.3485	79.3167	86.9161	92.9602	95.7041	98.5711	105.437	94.5749	90.4372
127	1.22867	1.27025	1.64098	1.79359	1.87373	2.11209	2.78923	3.71321	3.55021	3.2255	3.27784	3.30941	3.93578	4.06223	4.20017	3.57235	3.28401	3.74217	4.58618	5.13064	4.95367	4.80499	4.68357	4.59464	4.59465
128	1.64162	1.81403	2.28995	2.51966	2.70768	2.52197	2.76003	3.14531	3.39202	3.73019	3.70727	3.42962	3.75792	4.13813	3.92881	4.36597	4.70778	4.4893	3.59959	3.50861	3.76757	3.62232	3.50682	3.50706	3.4531
129	2.8681	2.82958	4.03648	4.47799	6.06039	6.96212	8.68191	9.80923	8.38844	7.27105	7.98099	7.13827	6.80259	5.85678	6.1624	5.60881	5.96554	6.16049	6.99483	8.12489	7.07456	8.64447	10.8587	13.6343	17.3714
130	1.61921	2.08942	2.16019	2.55038	2.99608	3.44949	3.44704	3.39686	3.66917	4.1085	4.2346	4.11518	5.07642	4.54874	4.55944	4.71778	4.9784	4.87323	4.98677	4.97613	5.66776	5.23091	5.75203	6.0822	5.74634
131	1.51476	1.21733	1.05691	0.986096	0.892072	0.907567	1.00993	1.10465	1.00286	0.989042	0.976867	1.03481	1.12548	1.20183	1.34512	1.38575	1.33796	1.32332	1.26248	1.23121	1.16839	1.14309	1.13875	1.13428	1.11785
132	5.46969	5.75212	6.53851	8.14707	8.79731	9.81939	10.3523	11.2768	11.9983	12.3449	12.1964	12.3954	13.5999	14.1094	14.877	14.9853	15.9734	16.1656	16.3877	15.1136	15.6834	15.6867	16.8445	17.6469	17.5605
133	0.818755	0.938613	1.14176	1.25996	1.40765	1.79881	2.38552	3.0206	2.53862	2.62012	2.79306	2.55168	2.91355	3.36969	3.45754	3.92116	3.76581	3.77473	3.91023	4.15169	5.17266	5.40174	5.10779	4.255	4.33814
134	0.915188	1.00702	1.12095	1.29327	1.3692	1.36713	1.36618	1.37597	1.24779	1.33415	1.61884	1.42544	1.30697	1.22157	1.25038	1.39959	1.4566	1.49021	1.47645	1.47275	1.48182	1.51341	1.495	1.48826	1.48468
135	0.87983	0.920463	0.975842	0.99023	1.01644	0.987706	1.09875	1.18702	1.19625	1.33766	1.47403	1.70604	1.76935	1.77029	1.78626	1.87973	2.00742	2.04664	2.12139	2.26448	2.50049	2.33262	2.38824	2.44584	2.47434
136	16.5327	14.7253	15.1704	15.7232	17.1764	18.5788	19.1027	20.0395	19.7035	21.376	23.889	22.3402	23.1174	23.6371	25.1218	26.365	24.515	24.5854	27.9408	27.3964	24.2371	27.7439	25.6361	28.0798	27.4391
137	0.702082	0.778597	0.811164	0.84153	0.906516	1.0255	1.18424	1.13827	1.13803	1.17044	1.21281	1.34798	1.43419	1.49478	1.61232	1.57564	1.64624	1.76327	1.79116	1.67036	1.63903	1.69384	1.80462	1.8345	1.81542
138	6.66552	6.28091	6.18989	6.65236	6.92024	7.75748	8.15389	7.87577	8.77518	9.39508	9.02912	8.52139	8.18843	8.89605	9.359	9.50782	10.1783	9.716	10.4191	11.0756	11.3648	11.4629	11.5727	11.1043	11.2713
139	4.48676	4.54884	4.52646	4.84704	5.59266	6.0044	6.95115	7.61774	7.71753	8.43927	8.74616	8.31465	8.75949	8.6836	8.66045	9.00807	10.3105	11.0201	10.1724	10.768	11.5683	12.0975	12.8528	13.3592	12.9485
140	1.37314	1.57485	1.9505	2.39324	2.54729	2.90148	2.67087	2.88924	2.92791	3.23591	3.02102	3.16886	3.45319	3.68369	3.33643	3.32326	3.56736	3.68764	4.08025	4.58367	4.99202	4.88986	5.06814	5.77891	7.47432
141	24.321	26.9404	28.1763	30.3196	28.964	30.1125	29.628	32.3537	30.6346	30.6462	29.2686	28.8897	28.2162	29.586	29.0816	29.3705	29.7738	29.8959	32.9939	32.7636	30.7396	28.7952	34.8424	35.5257	36.859
142	1.94638	1.9566	2.11359	2.4176	2.58285	2.57246	2.71281	2.82759	2.99159	2.96705	3.00306	2.95323	3.05218	3.08932	2.94524	3.38782	3.60801	3.64142	3.71643	3.82281	3.48942	3.49687	3.85984	3.69282	3.88796
143	1.65116	1.86691	1.79822	1.86171	1.9362	1.93392	1.82016	1.84622	2.08084	2.17144	2.05807	2.02803	1.81818	1.69804	1.74768	1.77342	1.80486	1.84697	1.9003	2.14461	2.32638	2.48106	2.62396	2.78654	2.78259
144	3.30825	3.64988	4.15391	3.7234	4.11276	4.73942	4.59322	4.45371	5.10137	5.31622	5.01764	5.76828	5.85016	6.19098	6.06058	5.9335	6.63387	6.84747	6.62017	6.76909	7.66926	7.19177	7.08716	7.47712	7.44016
145	3.45493	4.14987	4.10587	4.30215	4.18812	5.66951	5.68573	5.7735	5.93643	5.88555	5.86755	5.27542	6.38765	6.9146	7.84533	7.49977	7.53105	7.25029	7.71128	8.13188	7.57991	7.41086	7.23755	7.17981	7.11907
146	1.84141	2.09607	2.52771	2.47794	2.65052	3.16815	3.08967	3.6712	4.07713	4.12297	4.17673	4.04469	4.53305	4.96759	5.05996	4.76392	4.44714	4.71243	4.62238	4.76824	5.84002	6.36207	6.22967	6.28851	6.17197
147	1.18496	1.3129	1.41199	1.52307	1.66541	1.67566	1.79682	1.7997	1.89806	1.84975	2.13138	1.95591	1.88316	1.96335	2.1355	2.25787	2.43466	2.43153	2.33925	2.473	2.33513	2.17722	2.1575	2.24224	2.34547
148	1.96599	2.25034	2.40805	2.43084	2.43697	2.28403	2.32363	2.83604	2.77866	2.83959	2.87175	2.90532	3.11282	3.22792	3.505	3.22472	3.33623	3.05364	3.62035	3.65332	3.33138	3.51859	3.65218	3.6293	3.34304
149	1.21903	1.32588	1.15452	1.17811	1.23356	1.35776	1.57101	1.81872	1.95058	1.95731	2.22236	2.30275	2.17188	2.65992	2.57729	2.51313	2.26081	2.06945	2.47867	2.40718	2.57101	2.89134	3.17078	3.55539	3.61836
150	1.49582	1.43581	1.48852	1.36271	1.49677	1.7423	1.71714	1.77979	1.61973	1.66728	1.5906	1.51376	1.50346	1.55621	1.57706	1.57095	1.53713	1.49842	1.5092	1.57452	1.52465	1.54556	1.54213	1.53499	1.53883
151	3.38231	3.64027	3.35232	3.28348	3.41186	3.75935	3.53959	3.71372	3.86845	4.10547	4.40861	4.42656	4.2575	4.33336	4.3735	4.23641	4.67985	4.28436	4.34011	4.35255	4.93586	4.82072	4.80332	4.55151	5.20075
152	3.10355	3.49028	3.44929	3.4795	3.45504	3.68755	3.75561	3.88463	4.13727	4.36289	4.47942	4.82259	5.06256	5.42505	5.31102	5.23359	4.79722	6.08759	6.72328	7.07949	6.60597	6.59728	6.95628	7.14464	6.21928
153	1.36633	1.66163	1.85014	1.83851	1.74991	1.69874	2.02781	1.98661	2.11498	2.13598	2.07741	1.96807	2.06906	2.21579	2.34483	2.52788	2.93862	3.08125	3.09819	3.12866	3.09766	3.06732	3.07139	3.49715	3.7113
154	1.29828	1.25975	1.50479	1.4409	1.41804	1.70442	1.84838	1.80072	1.95681	2.17193	1.98368	1.96495	2.10186	2.05024	2.09957	2.34	2.32386	2.33429	2.4162	2.57161	2.51508	2.36414	2.29479	2.27163	2.15344
155	62.603	54.924	51.4244	50.7516	51.1282	52.9741	55.757	56.7385	56.2551	58.2788	60.0516	58.6099	61.2622	62.1294	63.4797	60.4003	64.4892	64.2186	65.9531	75.2109	74.249	62.2915	63.0836	62.5656	72.6099
156	3.28295	4.60463	5.5252	5.95985	6.43657	7.26026	6.95461	6.83077	6.23406	7.03092	7.3639	6.93826	7.50762	8.52953	9.19347	11.3315	11.416	11.624	11.0236	10.9542	13.4566	13.8439	15.0833	17.3878	20.1683
157	1.16721	1.01799	0.794838	0.869173	0.889137	1.00392	1.08921	1.37491	1.45119	1.48666	1.52429	1.60215	1.52712	1.53446	1.6701	1.80538	1.80887	1.94425	2.00666	1.94681	2.0158	2.10354	2.09245	1.993	2.02894
158	2.73273	2.96629	2.49117	2.49303	3.04916	2.87357	3.30294	3.90301	4.22585	4.28212	4.08977	4.25098	4.16511	3.95494	3.6458	3.31091	3.27147	3.55382	3.94845	4.36205	4.24715	4.47251	4.71453	4.71453	4.71453
159	5.34755	5.75533	5.89315	6.25604	6.22585	5.42601	5.15794	5.43393	5.71357	5.69607	6.17394	6.16807	5.98786	5.97479	6.07351	6.57835	6.70654	6.65008	6.75093	7.19308	8.39464	8.86942	9.15797	9.37788	9.38637
160	2.08067	1.77817	1.83599	1.82731	2.05687	1.95124	1.99573	2.22514	2.04357	2.09863	2.20448	2.21381	2.44205	2.46378	2.33438	2.20557	2.22993	2.45742	2.92639	3.2251	3.16773	3.19548	3.28584	3.18104	3.29618
161	1.27448	1.04522	0.788501	0.792939	0.798037	0.853723	0.802465	0.76516	0.746307	0.812399	0.960522	1.0841	1.1892	1.26095	1.24598	1.37967	1.40612	1.63214	1.71117	1.63353	1.49681	1.40541	1.41616	1.4216	1.41699
162	2.85005	1.86938	1.51898	1.5174	1.59619	1.40163	1.38585	1.38401	1.69902	1.81806	1.87136	2.10891	2.24796	2.14081	2.26897	2.54531	2.89827	2.74548	2.95985	3.21702	3.1673	3.39773	3.48863	3.26473	3.01015
163	25.0619	26.3301	25.9187	24.8768	24.704	23.91	24.9771	26.2255	26.0508	25.7292	27.4613	27.6975	29.3508	27.3374	28.5354	28.9485	27.9994	31.3851	32.7632	32.2046	30.5558	35.1278	42.5774	46.2516	50.2903
164	1.80586	1.72289	1.68502	1.61009	1.52401	1.64234	1.69339	1.88366	1.68165	1.75546	1.69887	1.87154	1.82911	1.62319	1.8389	1.7538	1.72358	1.72715	1.71643	1.76996	2.02074	2.27864	2.60056	2.42752	2.48519

## Sheet: SpeedResponseCuves_dark
Cell #/Speed bins (cm/s)	0-2	2-4	4-6	6-8	8-10	10-12	12-14	14-16	16-18	18-20	20-22	22-24	24-26	26-28	28-30	30-32	32-34	34-36	36-38	38-40	40-42	42-44	44-46	46-48	48-50
1	6.11049	5.68487	5.26703	4.94615	5.02635	4.44161	4.15557	4.15472	4.11863	3.83477	3.94827	3.75457	3.74524	3.60721	3.45942	3.56888	3.57635	3.79497	3.73635	3.83749	3.87112	3.9185	4.19699	4.90801	5.61248
2	3.23079	2.57555	2.15238	1.93647	1.88397	1.68066	1.60518	1.42854	1.28888	1.32604	1.28588	1.3341	1.32672	1.34056	1.3837	1.27406	1.22762	1.22395	1.1332	1.10467	1.1686	1.20157	1.28854	1.33974	1.36809
3	0.767493	0.537595	0.394731	0.30463	0.25989	0.241164	0.224957	0.211901	0.204262	0.19911	0.198154	0.199498	0.202995	0.20797	0.210478	0.213671	0.217202	0.217148	0.217276	0.217316	0.217364	0.21742	0.217441	0.217497	0.217488
4	0.767493	0.537595	0.394731	0.30463	0.25989	0.241164	0.224957	0.211901	0.204262	0.19911	0.198154	0.199498	0.202995	0.20797	0.210478	0.213671	0.217202	0.217148	0.217276	0.217316	0.217364	0.21742	0.217441	0.217497	0.217488
5	2.15346	1.85576	1.30838	1.18247	1.05951	0.902882	0.783176	0.663163	0.645439	0.659494	0.655978	0.626072	0.61673	0.660196	0.660067	0.634983	0.634495	0.58914	0.574053	0.567273	0.564481	0.553293	0.550394	0.557386	0.560794
6	8.52009	6.18189	4.91252	4.21604	3.5647	2.5211	1.83292	1.4496	1.08341	0.793807	0.577472	0.443577	0.375198	0.343097	0.320503	0.314953	0.309475	0.313186	0.294466	0.284257	0.277899	0.274669	0.273445	0.272998	0.272997
7	10.2441	6.3942	5.18311	4.34726	3.55357	2.7906	2.33305	1.9308	1.69808	1.37079	1.11088	0.909314	0.770305	0.694143	0.634366	0.629217	0.632548	0.615435	0.578376	0.55351	0.541388	0.540836	0.535043	0.532619	0.531461
8	8.43583	6.22904	5.34172	5.69177	4.82121	3.66442	2.38932	1.88289	1.4209	1.21462	1.12188	0.900542	0.816958	0.764274	0.762673	0.728443	0.713511	0.660001	0.608242	0.573672	0.54331	0.521709	0.508819	0.501158	0.498402
9	10.266	8.06516	6.50813	6.05382	5.10519	4.36268	3.6119	2.66735	2.06234	1.48909	1.24401	0.876549	0.676748	0.560587	0.470396	0.396684	0.349926	0.308829	0.290984	0.28288	0.279861	0.272431	0.269021	0.267611	0.267166
10	2.70236	2.40971	1.89127	1.85371	1.6961	1.43899	1.2902	0.953117	0.698675	0.595017	0.467023	0.374028	0.335836	0.313257	0.297364	0.268668	0.244539	0.23099	0.223687	0.216914	0.212475	0.210155	0.209239	0.2089	0.208901
11	17.0213	16.0003	15.584	15.0451	14.9127	14.4973	12.8897	12.8355	12.3608	13.1607	12.94	12.5375	11.4964	10.9431	11.7777	11.3692	12.3821	11.7822	11.5467	11.3738	11.5701	12.58	12.403	12.8209	13.2227
12	1.79373	1.85075	1.96077	1.90707	1.74746	1.44171	1.23476	1.17468	1.00513	0.906955	0.806417	0.797473	0.799883	0.797672	0.761745	0.740369	0.696448	0.678264	0.674681	0.667612	0.658665	0.656551	0.649281	0.646879	0.646879
13	3.44066	3.61623	3.16745	2.84839	2.86212	2.69871	2.63439	2.47426	2.31132	2.50501	2.38744	2.11062	2.30414	2.60497	2.504	2.46632	2.2191	2.22965	2.39256	2.19136	2.10528	2.08594	1.9277	1.97457	2.0536
14	1.16887	1.58278	1.66205	1.56334	1.4244	1.45228	1.33096	1.1572	1.1328	0.951299	0.86885	0.829213	0.756465	0.787141	0.759783	0.708502	0.642478	0.563806	0.501687	0.475417	0.465041	0.45126	0.439252	0.427294	0.422523
15	27.6777	29.2774	30.8688	29.3303	27.9107	27.21	26.0103	23.9379	22.3573	22.0569	21.3089	19.0959	18.7812	18.5376	16.8362	15.8357	15.8445	16.4025	14.5581	14.7169	14.5207	13.6378	13.8863	13.7144	13.3901
16	35.4412	36.0753	35.1996	33.5752	31.5898	31.1754	28.8164	26.9939	26.3587	24.1043	23.6507	22.0421	21.7121	20.5443	19.0136	18.9689	17.7147	17.8441	17.5779	18.1824	15.4094	16.1452	16.2672	16.1878	14.4122
17	3.0731	2.69773	2.87373	2.85958	2.56833	2.41754	2.46683	2.62996	2.35672	2.21711	2.24407	2.19611	2.14059	1.91252	1.72233	1.53681	1.53431	1.5382	1.52613	1.52827	1.52768	1.52409	1.50648	1.50648	1.50648
18	2.74604	2.7072	2.66317	2.51437	2.51359	2.30812	2.21744	2.22327	2.13894	2.08022	2.05793	1.85264	1.78928	1.57773	1.58982	1.67753	1.61038	1.51512	1.41472	1.37694	1.3372	1.3156	1.3031	1.3031	1.3031
19	3.73696	4.75909	5.0252	4.86694	4.31593	3.53061	2.87981	2.9709	2.74617	2.44507	2.17788	2.64081	2.54326	2.21051	2.25861	1.85496	1.81515	1.90905	1.77042	1.57279	1.4188	1.21687	1.1618	1.13712	1.11303
20	2.85246	2.84133	2.611	2.28204	2.07789	2.0196	1.90883	1.84938	1.91819	1.96519	2.02678	1.82413	2.12176	2.36237	2.20423	2.04559	1.89322	1.82893	1.81288	1.80693	1.82577	1.84705	1.84705	1.84704	1.84704
21	2.91254	2.4124	2.87821	2.69538	3.46344	3.31085	2.80261	2.70758	2.68202	2.65137	2.6246	2.28246	2.23764	2.18084	2.21013	2.2858	2.35638	2.44419	2.3324	2.32718	2.24093	2.19567	2.03363	1.95762	1.88446
22	21.143	23.8184	23.9947	23.0646	22.756	22.7902	21.4794	21.6629	20.3329	20.6011	19.9882	22.0271	20.1838	19.2506	17.0478	18.2875	16.7977	18.9275	17.9843	17.0326	15.7031	14.857	13.5094	13.6251	13.7696
23	2.9463	3.25438	3.55966	3.54035	2.94367	3.19478	3.23328	3.04195	3.04463	3.27353	3.33887	3.2251	2.76469	2.20483	1.8306	1.70846	1.68316	1.64472	1.56695	1.56661	1.55716	1.50249	1.46452	1.44241	1.43522
24	9.28756	10.8716	11.2899	11.1509	11.0289	10.983	10.9691	11.37	10.8761	11.343	11.0912	10.3886	10.802	10.5776	10.7474	10.2089	9.68981	9.19626	9.09692	8.56889	7.89987	7.76549	7.76549	7.7655	7.7655
25	1.72201	2.14274	2.68348	2.7402	2.71571	3.048	3.48108	3.53469	3.76299	3.70295	3.52055	3.00808	3.1032	3.46897	3.0499	2.72324	2.55161	2.40759	2.44804	2.61592	2.57209	2.69923	2.81908	2.85545	2.84413
26	1.00325	1.0778	1.21758	1.30108	1.36307	1.31742	1.37197	1.3739	1.4577	1.56812	1.54878	1.50717	1.50053	1.29528	1.1925	1.2004	1.20239	1.22429	1.22385	1.23686	1.25571	1.27564	1.27564	1.27563	1.27562
27	15.3975	19.7715	20.378	22.5451	24.2751	27.1965	28.4292	28.2616	28.6712	26.6467	25.3479	24.8013	23.3677	22.1321	23.9929	24.9866	25.1343	23.7199	23.1604	22.5246	21.6982	20.8138	19.6531	19.9702	18.9141
28	3.19899	4.12163	4.41882	4.86515	5.19229	4.6741	4.83179	5.29561	5.47755	5.49456	5.42735	5.68185	5.33493	4.6724	4.45882	4.10401	3.56726	3.25152	3.30423	3.29131	3.47878	3.62769	3.56798	3.38921	3.30238
29	12.9257	16.5153	17.8409	19.2471	19.853	19.7953	20.1947	20.8704	20.339	21.0973	21.463	21.2933	20.7351	22.084	20.7023	17.936	18.3717	16.2479	17.4993	17.1544	16.1085	15.891	15.891	15.891	15.891
30	1.69782	2.21324	2.63732	2.63223	2.90639	3.07953	3.27483	3.38588	3.65583	3.51661	3.11655	2.96938	2.9606	3.03756	2.81713	2.63411	2.63238	2.59534	2.64243	2.45368	2.3452	2.28826	2.12615	2.10518	2.03302
31	1.62463	1.77201	2.13768	2.35012	2.67808	2.89608	2.88904	3.34758	3.58634	3.45423	3.84713	3.73077	3.17985	3.36717	3.17232	3.14756	2.61979	2.41614	2.03523	1.87407	1.72037	1.67227	1.63921	1.64367	1.64367
32	8.1151	12.7412	15.9054	17.5097	19.2018	20.6872	20.7323	22.4188	23.7762	23.4412	24.9468	26.863	26.3602	26.4934	26.3452	25.2033	28.0736	25.8783	23.8339	22.6581	20.211	18.2634	18.2635	18.2635	18.2635
33	0.987203	1.28072	1.40121	1.42171	1.52444	1.50609	1.77148	1.8058	1.70326	1.77058	1.64798	1.76007	1.80374	1.59192	1.84439	1.6689	1.54097	1.41215	1.40604	1.37552	1.4046	1.44407	1.40597	1.41119	1.40031
34	0.637978	0.743961	0.852293	0.922988	0.916872	0.89376	0.897571	0.979695	0.985865	0.996952	1.08541	1.07841	1.06734	1.12728	1.14351	1.17101	1.21382	1.2745	1.22728	1.09795	1.00573	0.942336	0.909764	0.857002	0.833469
35	13.8761	16.4726	18.5729	18.6402	19.4528	21.3948	21.8413	22.0944	23.275	22.9388	25.7565	24.3436	22.4809	22.0684	25.6891	24.497	22.3728	19.6433	18.207	16.366	15.8595	15.8908	16.6901	17.2653	18.1571
36	8.3184	10.3082	11.5393	12.7421	13.9452	14.0059	13.0923	13.4118	13.2748	13.137	13.195	12.3914	12.1759	11.5984	12.3383	12.5756	12.2933	12.6687	12.6248	12.6248	12.6247	12.6247	12.6246	12.6245	12.6245
37	1.66147	1.71821	1.64258	1.68724	1.61527	1.67517	1.7177	1.74472	1.71337	2.0692	1.87755	1.93371	2.24571	2.19449	2.10225	1.95681	1.96203	1.99437	1.93697	1.89764	1.87843	1.86241	1.8624	1.86241	1.8624
38	14.6647	17.2586	20.0366	22.8129	24.3068	25.3377	26.4637	25.3709	25.6782	25.4916	26.3461	26.5396	26.6696	26.5684	27.4097	25.8586	24.7157	23.7374	24.8068	22.4175	23.1244	20.1078	17.8283	17.5848	16.9337
39	20.0675	23.928	26.8916	28.1038	27.2805	29.8617	29.4057	31.4222	31.9665	32.5275	33.3591	33.2024	33.3167	33.7902	32.9403	32.068	30.1537	30.2692	28.7652	25.5104	24.0185	23.55	25.4332	25.4566	23.946
40	3.30448	3.72557	4.39509	4.80983	5.44844	5.52525	5.58714	6.00403	5.87161	5.9944	6.12994	6.38312	6.66664	6.65412	7.38441	7.5361	7.54178	7.17103	5.99674	5.90836	5.06324	5.04599	5.375	5.39685	5.13728
41	1.76462	2.38712	2.62668	2.84252	2.9023	3.25594	3.28462	3.01081	3.29374	3.94121	3.74038	3.53406	3.33109	3.46501	3.38727	3.59666	3.5511	3.46535	3.46536	3.46536	3.46536	3.46537	3.46539	3.46541	3.46542
42	9.67607	11.1979	12.5336	13.4867	13.909	14.5067	14.3017	14.7434	16.4713	16.2851	15.7917	15.931	17.7863	17.4765	18.1715	16.8958	15.5162	14.4517	14.2722	14.2722	14.2722	14.2721	14.2721	14.272	14.272
43	1.20353	1.62619	1.84016	1.87085	1.76919	1.93779	2.05581	2.23382	2.10306	2.00626	2.01294	2.10679	2.23125	2.12957	2.00656	1.91303	1.88622	1.85985	1.85985	1.85985	1.85985	1.85985	1.85988	1.85989	1.8599
44	17.8562	25.5236	27.7855	30.6185	31.1608	32.1456	33.1116	33.887	34.1535	34.5201	34.2424	34.7939	33.2014	33.0558	32.8089	34.9184	35.9801	33.3546	33.4211	33.9028	30.5837	32.1357	32.4069	33.3726	33.7171
45	5.35508	5.39832	5.85783	5.91083	5.88491	5.88187	6.40421	6.78696	7.07656	6.41494	7.04686	6.59381	6.64255	6.68303	6.60496	7.26818	8.13095	7.76953	7.59513	7.63433	7.51704	7.37825	7.3782	7.37819	7.37818
46	1.54963	2.0809	2.44203	2.6794	2.6277	2.59295	2.62752	2.84565	2.53199	2.4179	2.32232	2.3492	2.19673	2.40421	2.67874	2.62736	2.62243	2.62246	2.62249	2.62251	2.62251	2.62252	2.62252	2.62256	2.62256
47	1.15568	1.12645	1.21361	1.30456	1.42789	1.75178	1.92296	2.11451	2.1935	2.21487	2.55331	2.57969	2.70411	2.92957	2.71837	2.75829	2.49214	2.29636	2.02817	1.88558	1.79047	1.72914	1.70686	1.71711	1.7171
48	0.592512	0.655426	0.756676	0.822572	0.965346	1.07654	1.2446	1.33892	1.31176	1.28569	1.26913	1.35298	1.26691	1.20438	1.17765	1.17603	1.2173	1.22564	1.21055	1.19966	1.19511	1.19511	1.19511	1.1951	1.1951
49	1.48445	1.82695	2.0363	2.42496	2.60241	2.66703	2.86565	2.58021	2.96973	3.30507	3.2309	3.25529	3.2249	3.10939	2.97163	2.9693	2.96598	3.1526	3.30985	3.44328	3.50459	3.58754	3.58752	3.58754	3.58752
50	0.880311	0.972969	0.98501	1.11266	1.24267	1.20977	1.35871	1.61189	1.76335	1.69763	1.77049	1.75294	1.65842	1.56409	1.49751	1.51531	1.62413	1.70176	1.83668	1.87649	1.77361	1.72164	1.71857	1.72078	1.6877
51	1.55223	1.46942	1.83933	2.2429	2.42912	2.76899	2.83593	2.91599	2.80922	2.72755	2.62933	2.46343	2.55372	2.43613	2.46426	2.39516	2.62344	3.04475	3.23218	3.28896	3.46505	3.38885	3.33675	3.16621	3.09991
52	0.993803	1.14904	1.26242	1.34848	1.45001	1.54512	1.70927	1.69688	1.8098	2.08125	2.16729	2.18571	2.22816	2.21005	2.16478	2.17661	2.17115	2.13381	2.11874	2.11874	2.11876	2.11876	2.11877	2.11878	2.1188
53	6.39641	6.52482	6.6837	6.50222	7.50272	7.93675	7.80983	9.19525	9.76752	10.0966	9.4923	8.96422	9.50484	8.85242	10.292	10.0604	8.09709	7.29476	7.0589	8.00835	8.65235	8.36516	8.53734	8.81991	8.97297
54	4.56353	4.52395	4.85871	5.58485	5.82626	5.78816	6.47247	6.41343	6.55228	7.03522	7.24986	7.3122	7.81336	7.93514	7.99975	8.34032	8.01715	8.46394	7.7323	7.22067	7.01326	6.56645	6.58345	6.49858	6.4986
55	2.05292	2.32792	2.47197	2.63251	2.96035	3.39578	3.48188	3.61398	3.69488	4.10041	3.85643	3.32575	3.40717	3.47286	3.33435	3.63233	3.71973	3.62076	3.49745	3.45839	3.63292	4.01147	4.22395	4.17047	4.17043
56	2.1521	2.64067	2.90268	3.25503	3.96682	4.04812	4.08756	4.06022	4.88693	4.62718	4.36415	5.06673	5.59108	5.96162	6.14681	6.05998	6.46765	5.45292	5.29731	5.48145	5.52896	5.75156	5.75161	5.75163	5.75167
57	2.73251	2.90763	3.60703	4.36152	4.84291	5.54559	6.18645	6.03147	6.51959	7.46323	7.10845	7.2958	8.10035	8.86872	7.53689	5.99563	6.32778	6.46133	6.4156	6.04532	5.33879	4.98636	4.81645	4.64187	4.54367
58	1.10226	1.41141	1.48733	1.56265	1.62308	1.64829	1.5735	1.66501	1.66112	1.79754	1.788	1.93294	1.87931	1.85918	1.75952	1.7958	1.89071	1.86186	1.99845	1.95999	1.97219	2.03358	2.07836	2.25768	2.4371
59	0.737591	0.815764	0.923379	0.945645	1.05021	1.15602	1.17436	1.27034	1.30408	1.34518	1.418	1.4019	1.2909	1.19254	1.18926	1.20959	1.22294	1.19708	1.18796	1.17746	1.19419	1.23513	1.228	1.21351	1.2079
60	1.36582	1.63229	2.1974	2.31641	2.79382	2.74372	3.18569	3.95577	4.34434	4.8386	5.00759	4.21485	3.65689	3.29416	4.31925	4.33695	4.10766	3.62704	3.66504	3.6176	3.61761	3.6176	3.6176	3.61759	3.6176
61	19.6162	18.7901	19.6579	19.9711	20.4984	23.0087	22.8373	23.7114	24.5976	24.6607	24.4962	25.0171	25.5432	27.1847	27.006	24.9246	26.5937	25.6113	25.2255	23.6925	24.3768	23.6763	23.1161	23.2173	23.2173
62	0.807859	0.91031	1.10472	1.19169	1.20516	1.3083	1.40548	1.66911	1.59845	1.5148	1.51982	1.72613	1.82303	1.9319	1.8641	1.97182	1.98504	2.03499	2.00954	1.99849	2.00184	2.04686	2.07357	2.08046	2.10587
63	2.08702	2.38567	2.56696	2.79337	3.05501	3.62714	3.84741	4.03242	4.38336	4.69745	4.92123	4.76382	5.26907	5.28325	5.92956	5.98919	5.23406	4.50088	4.71268	4.90289	5.05894	4.85549	4.55243	4.63609	5.08409
64	0.532071	0.57959	0.669509	0.71565	0.693264	0.663314	0.729977	0.833882	1.0339	0.983938	0.977066	1.04494	1.30284	1.36645	1.63731	1.74416	1.76671	1.83919	1.95367	2.00527	1.99506	1.97909	1.97727	1.97727	1.97727
65	8.33956	10.1251	11.2409	11.7017	12.5545	12.2624	13.679	13.4298	14.6567	14.5164	14.8836	14.7976	15.2322	14.7465	14.8429	14.7773	13.8563	13.9899	15.7671	14.9642	16.8384	15.1928	13.8479	12.5865	11.8654
66	4.80442	5.64398	7.08301	7.72343	8.19098	8.60428	9.28058	10.0101	10.1319	10.1182	10.5438	11.1124	11.7869	11.9385	11.1924	11.1843	12.1524	12.4756	12.4647	12.6758	12.3597	12.181	12.181	12.1809	12.181
67	1.55905	1.82396	2.12588	2.22619	2.41158	2.55664	2.68395	2.76891	2.9616	3.08624	3.35072	3.23692	3.50875	4.01649	4.18201	4.18287	4.18286	4.18285	4.18287	4.18288	4.18289	4.1829	4.18289	4.18288	4.18286
68	2.79203	2.87066	3.0936	3.08033	3.36007	3.82052	3.64712	3.50439	3.57935	3.607	3.78632	4.37527	5.01267	4.83852	4.93668	4.34894	4.62402	4.0618	3.70404	3.70268	3.92205	3.94209	4.34262	4.41511	4.64435
69	8.90902	10.5601	11.2749	11.9894	12.3025	13.3465	13.5811	13.901	14.097	15.0587	15.3363	14.8358	14.8943	15.2896	14.7087	15.0901	16.5315	14.9529	16.9209	15.1186	16.3924	17.6202	16.9603	15.462	15.6787
70	5.80744	6.18612	6.28091	6.41122	6.84569	7.6552	8.37772	8.44114	7.66378	7.94504	8.79315	8.72725	9.21758	9.3763	10.7409	9.95673	9.93536	9.57277	10.0254	9.99041	10.0009	9.37613	8.78868	8.74918	8.94115
71	0.530808	0.591868	0.645451	0.729344	0.799683	0.949703	1.14205	1.19537	1.25652	1.25546	1.36376	1.50874	1.49987	1.65087	1.81516	1.7265	1.74906	1.77824	1.81702	1.80734	1.83442	1.91228	1.88889	1.88029	1.88029
72	3.45724	3.50653	4.25096	4.30746	4.30575	4.85785	5.34217	5.70983	6.0696	6.32696	6.81768	7.62656	7.59745	7.60768	6.39251	6.24466	5.36309	6.01921	6.79076	7.32674	7.80902	7.92698	7.92697	7.92702	7.927
73	0.525991	0.744656	0.947354	1.21035	1.17351	1.20665	1.34037	1.31427	1.39237	1.20258	1.31465	1.28728	1.24436	1.33287	1.35971	1.31688	1.39768	1.55772	1.48609	1.44729	1.37434	1.29074	1.23212	1.19461	1.18703
74	3.16612	4.24351	4.39303	4.2645	4.2347	4.94028	5.2232	5.55487	5.73368	6.12765	6.0957	6.28979	5.76664	5.97711	5.64824	5.61454	5.87779	5.08362	5.09808	5.2924	5.99121	6.83746	6.51941	6.32261	6.43944
75	2.32202	2.22513	2.36183	2.44158	2.80825	2.91329	3.0922	3.06571	3.1099	3.46519	3.88648	4.32638	4.21238	3.99273	3.826	4.36459	4.44822	3.94139	3.85889	4.15354	3.9538	3.58072	3.63782	3.76322	3.67608
76	0.584084	0.637995	0.643554	0.728287	0.766419	0.791136	0.898312	0.986041	1.0144	1.11869	1.1851	1.14886	1.14067	1.06657	0.998518	1.00978	0.948344	0.900515	0.964056	0.940748	0.915632	0.924706	0.943316	0.983729	1.00665
77	2.98079	3.33617	3.98665	4.75382	5.61382	5.90925	6.03032	6.4869	6.8017	7.51948	8.27649	7.76219	8.41639	8.77323	9.01967	8.79091	8.01693	9.11729	8.92564	7.94299	7.59553	7.85681	7.92571	8.14921	8.1796
78	0.633006	0.709678	0.815062	0.936745	0.970807	1.10989	1.52682	1.7393	1.72789	1.99	1.90906	1.87957	1.86342	1.7642	1.80267	2.04457	2.22356	2.08082	2.08995	2.03063	1.95822	1.97072	1.9098	1.81646	1.76158
79	2.30042	2.18403	2.19885	2.37697	2.3002	2.34451	2.85746	3.20658	3.01193	3.04504	3.32552	3.19737	3.46891	3.02063	2.98618	2.86864	2.96392	3.21153	3.25735	3.23426	3.27535	3.27125	3.26232	3.26232	3.26233
80	1.53952	1.63891	1.95684	2.06221	2.33195	2.82866	3.39811	3.17854	3.03846	2.99176	2.69387	2.8107	2.9922	3.03321	3.33431	3.78372	3.50876	3.53223	3.78655	3.9706	3.93167	4.43827	4.57306	4.38618	4.36311
81	1.44598	1.54626	1.6075	1.73096	1.71981	2.04307	2.25079	2.41119	2.61396	2.81299	3.04675	3.19706	3.242	3.31691	3.27963	3.41729	3.77887	3.8078	3.76817	3.54841	3.63182	3.54589	3.28389	3.05433	2.83756
82	1.10468	1.50226	1.67822	1.51496	1.50826	1.73946	1.94041	2.13501	2.11262	2.40167	2.37649	2.72767	3.05887	3.00107	3.06622	2.98495	2.6739	2.60173	2.65425	2.5564	2.5005	2.4869	2.48688	2.48686	2.48686
83	2.64471	2.87284	3.05484	3.13985	3.30265	3.70946	3.90721	4.34054	4.65733	4.19201	4.78926	4.33607	4.09876	4.90026	4.43397	4.79188	4.90486	5.39576	6.21641	7.3032	6.57661	6.52665	6.57757	6.7013	6.46494
84	3.85324	4.60272	5.21395	5.34422	6.0511	6.67184	6.77199	7.47854	7.72622	7.42831	7.67672	8.172	8.26799	8.95281	9.16143	8.90378	9.43933	10.2423	10.8271	11.0926	11.3392	11.5861	11.5861	11.586	11.586
85	1.07733	1.10009	1.1698	1.15157	1.24883	1.39622	1.4981	1.89863	2.12664	2.21102	2.03982	1.96443	2.11817	1.94237	1.72057	1.89045	1.86985	1.80427	1.5839	1.38794	1.2713	1.18278	1.1181	1.08748	1.07915
86	0.784763	0.835213	0.839382	0.982242	1.07098	1.13886	1.13793	1.19682	1.23368	1.32608	1.33237	1.40651	1.4222	1.32695	1.39651	1.52591	1.64163	1.67525	1.67131	1.69194	1.69194	1.69194	1.69194	1.69195	1.69195
87	3.55643	3.97069	3.97389	4.03046	4.21658	4.32997	4.35594	4.73228	4.7311	4.51441	4.99499	5.31753	5.2183	5.30996	4.57579	4.00129	3.36226	2.93275	2.74895	2.65663	2.57827	2.51897	2.4832	2.48319	2.48318
88	3.20322	3.29495	3.52139	3.96935	4.25476	4.95479	5.16978	5.15097	4.81001	5.61383	5.37356	5.7005	5.53106	5.50996	5.18591	5.18471	4.81977	4.93155	5.04312	5.12525	5.23171	5.23874	5.78579	5.99789	6.42138
89	0.945075	0.923621	0.899889	0.973779	1.15225	1.13905	1.26051	1.44123	1.64663	1.72551	1.75763	1.76494	2.17135	2.38862	2.36919	2.53562	2.59655	2.57756	2.52048	2.38054	2.31551	2.28328	2.28241	2.26317	2.2695
90	2.95444	3.07049	3.58369	4.26085	4.39149	4.55718	4.14122	4.11806	4.8145	4.53304	5.36896	5.60526	5.65742	5.69379	5.96477	6.02441	6.03242	6.30704	6.36668	5.8208	5.49862	4.94101	4.58279	4.33477	4.12702
91	0.916178	0.923718	1.06468	1.1469	1.23345	1.4121	1.52647	1.56378	1.61358	1.5472	1.49884	1.55496	1.53154	1.56632	1.7203	1.86023	1.91131	1.98218	2.07088	1.97408	1.98398	2.0078	1.9433	1.93802	1.91803
92	0.74908	0.849737	1.12448	1.16386	1.11155	1.23499	1.48933	1.61963	1.66584	1.65707	1.76909	1.74458	1.73724	1.75571	1.69929	1.69911	1.54438	1.45258	1.41667	1.44099	1.48541	1.50216	1.52813	1.56313	1.58262
93	3.03175	3.05944	3.26065	3.38935	3.40937	3.3511	3.9399	3.90576	4.26435	4.30207	5.05106	5.78095	5.50373	5.12414	4.88125	5.47397	5.22579	5.52122	5.10659	5.32042	4.83097	4.44587	4.21477	3.98672	3.92892
94	16.9113	17.5934	18.4366	18.8355	20.4803	20.691	21.9105	21.4965	23.3122	23.3712	23.7014	24.3502	26.0022	25.0761	26.299	26.2975	27.9792	26.5868	26.4631	27.3029	29.0334	29.9219	28.8953	27.461	28.2797
95	0.882946	1.0343	1.18057	1.26896	1.31855	1.41539	1.47016	1.60996	1.65424	1.64139	1.65169	1.85392	1.8864	1.93346	1.91083	1.96173	2.11334	2.11877	2.23432	2.29536	2.24226	2.18803	2.188	2.18797	2.18796
96	2.01426	1.91927	1.641	1.83284	2.05651	2.08062	1.93497	1.77758	1.80885	1.94816	1.71153	1.91647	1.7604	1.82485	1.93825	1.95588	1.86764	1.75549	1.8143	1.68425	1.5397	1.55036	1.62997	1.69086	1.70401
97	1.81668	2.50715	2.99694	2.93636	3.12387	3.70552	3.70019	3.64987	3.77536	3.94268	4.07712	4.33351	4.05851	3.75144	3.90929	4.20809	4.49821	4.79749	5.04492	5.14597	5.04859	5.28093	5.76456	5.99238	5.84839
98	1.0927	3.26352	4.35635	4.92937	4.98892	5.52534	6.58962	8.11904	8.63046	8.62907	9.05792	8.06996	7.76019	8.57175	10.9465	12.6605	12.1701	11.7402	11.3455	11.0456	10.7859	10.6277	10.6282	10.6285	10.6287
99	1.1815	1.23178	1.47331	1.59461	1.60066	1.60472	1.70477	1.96818	2.09678	2.01853	2.01437	1.93673	2.09303	2.23792	2.25834	2.37009	2.31359	2.24376	2.40416	2.60165	2.70931	2.54075	2.57106	2.55207	2.50977
100	1.90847	1.83237	1.9304	2.37901	3.66311	3.64353	3.45295	3.76995	3.95489	4.08262	3.53101	3.42514	3.82615	3.99792	3.76072	4.06444	3.51188	3.39755	3.39284	3.03525	3.17416	3.4731	3.71027	4.2898	4.76771
101	1.5634	1.55169	1.97813	2.19754	2.20092	2.30633	2.35891	2.34502	2.25668	2.50597	3.0358	3.31827	3.21721	3.19708	3.08167	2.86264	2.88655	2.86193	2.8724	2.98725	3.15753	3.25756	3.22945	3.20431	3.20784
102	18.0493	22.9419	22.788	25.0172	24.9087	25.3089	27.8603	28.3542	28.9494	28.5238	28.3677	30.3906	29.2529	30.5895	31.9737	31.3734	31.1729	30.1022	32.3991	34.7303	31.0518	32.9509	33.6662	29.2567	29.5921
103	0.804278	0.886003	0.921991	0.870536	0.807942	0.791327	0.914734	1.01187	0.932411	0.995492	1.15188	1.26781	1.39835	1.64669	1.91383	1.83747	1.77472	1.87469	1.77151	1.70128	1.65024	1.62005	1.59397	1.5949	1.59174
104	1.63708	1.9166	2.02709	2.07912	2.21906	2.24739	2.48803	2.80592	2.97327	2.95932	3.03162	3.10331	3.25766	3.46818	4.3466	4.69767	5.25308	5.14076	4.69112	4.74376	4.5743	4.45966	4.39968	4.17354	4.03506
105	0.731715	0.734388	0.671592	0.694112	0.707923	0.703696	0.678155	0.688168	0.690503	0.710431	0.697841	0.633056	0.691397	0.659327	0.653207	0.684898	0.661269	0.639618	0.755903	0.760232	0.824273	0.785168	0.686537	0.683081	0.657326
106	10.1342	11.0417	12.4022	13.1075	13.8611	15.109	16.1836	16.9775	18.6491	18.9037	19.8785	20.35	19.4425	17.4534	20.6183	21.8639	24.3974	25.6857	22.6568	22.2502	21.9	21.9375	22.6574	21.2243	22.2787
107	4.30701	3.77604	3.79337	3.88706	4.07722	4.03763	4.31053	4.45621	4.68625	4.65472	4.81099	4.81007	5.20177	5.50195	6.03253	5.92166	5.57498	5.44424	6.09538	5.97683	5.38628	5.4053	5.62562	5.55052	5.39901
108	3.34373	3.86861	4.54528	4.9149	4.85936	5.27923	5.58964	5.77098	6.04201	5.97786	6.51385	6.94013	7.65485	7.64598	8.1548	8.32774	8.23746	8.91658	9.30197	9.30198	9.30196	9.30194	9.30192	9.30185	9.30183
109	2.21193	2.40584	2.59658	2.50484	2.80681	2.70716	2.84166	3.19243	3.27155	3.36654	3.12059	3.14855	2.93547	3.51461	3.25157	3.24718	2.97897	3.08931	3.08311	3.3105	3.22641	3.29394	3.36897	3.44629	3.55267
110	1.61753	1.55968	1.49095	1.53133	1.58842	1.77602	1.94975	2.07033	2.13945	1.97992	2.17048	2.37386	2.51088	2.57091	2.62138	2.39661	2.46211	2.67947	2.64124	2.32412	2.39878	2.36166	2.30226	2.42551	2.15847
111	2.69675	2.99555	3.54509	3.63142	4.40148	4.35373	4.63805	5.24653	5.11741	5.06362	5.47333	5.41588	5.48666	5.38972	5.77854	6.78052	6.41646	7.09664	8.02867	7.07777	6.9393	7.11372	7.04624	6.958	6.49213
112	18.4948	17.3377	17.0872	18.474	19.8649	19.9047	20.5085	19.9184	19.8759	20.6545	19.8701	21.8372	24.5092	25.801	26.7149	25.3922	27.2214	26.2203	24.1241	22.5678	23.0718	22.6001	22.2201	21.0533	20.9278
113	1.07617	1.07863	1.07667	1.17715	1.46361	1.40674	1.4538	1.42253	1.44182	1.44558	1.57349	1.68426	1.68487	1.64735	1.60759	1.6718	1.61782	1.68842	1.80612	1.95822	2.1262	2.18527	2.18525	2.18526	2.18528
114	1.19892	1.20258	1.32465	1.44153	1.61924	1.72286	1.81994	1.90419	2.12117	2.33444	2.36396	2.39059	2.45731	2.56943	2.51383	2.59239	2.53049	2.72134	2.99709	3.14924	3.18652	3.04441	2.92063	2.74224	2.69802
115	4.50912	4.96871	5.22041	5.20084	4.64109	4.82443	4.07873	3.98731	4.26916	4.4544	4.05282	4.02627	4.59512	4.60519	4.95033	4.90209	4.94163	4.73701	5.01806	5.3164	4.75712	4.65747	4.28748	4.17707	4.05062
116	1.02708	1.03292	0.996692	1.14248	1.16923	1.36379	1.49181	1.55802	1.67847	1.86186	2.01974	1.97705	2.35994	2.31298	2.38808	2.44969	2.43619	2.56492	2.71734	2.79249	2.74536	2.79713	2.76935	2.81928	2.9376
117	1.59497	1.69001	2.15565	2.1352	1.95047	2.05997	2.1237	2.16504	2.04985	2.16811	2.27836	2.56224	2.83259	3.01974	3.18561	3.1623	2.8796	2.87102	3.01254	3.40472	3.82853	4.0944	3.96855	3.81182	3.7146
118	3.44422	2.94734	2.36832	2.1445	2.12185	2.34084	2.22627	2.43103	2.39673	2.40781	2.58008	2.83079	3.066	3.16051	3.16059	3.16055	3.1605	3.16046	3.16054	3.16061	3.16071	3.16089	3.16096	3.16114	3.16117
119	0.939489	1.01167	1.24082	1.23107	1.26112	1.51036	1.62824	1.73603	1.8649	1.9727	2.10816	2.24988	2.23067	2.23571	2.32399	2.07736	2.18177	2.19225	2.35154	2.42252	2.42213	2.70834	2.98965	2.94244	2.97635
120	4.47931	4.1682	3.88662	4.3673	4.13649	4.60461	4.5183	4.9966	5.30094	4.82164	5.41018	5.42572	5.51459	6.22026	6.39459	6.97433	7.23323	7.21603	8.33987	7.86676	7.35568	6.65098	6.25621	6.16038	6.16038
121	2.04323	2.0204	2.2478	2.70591	3.07128	3.3111	3.56912	3.45777	3.35281	3.40651	3.55978	3.89511	4.05528	4.0188	4.03422	3.99512	4.39663	4.28986	4.30734	4.41147	4.9251	4.64856	4.94548	5.34174	6.07471
122	1.91205	1.93306	2.01629	1.9947	2.03032	2.23927	2.34933	2.36899	2.51581	2.31563	2.32425	2.31443	2.39462	2.40859	2.48414	2.40018	2.48857	2.71199	2.85509	2.82288	2.82161	2.98081	3.06171	3.1003	3.11894
123	46.9904	47.8141	51.9417	53.4755	53.9182	54.8785	53.6271	54.1791	54.644	55.2447	57.1233	60.0763	57.3697	59.4108	61.5453	63.3349	62.5024	59.2474	57.1675	59.758	65.5851	61.5219	59.1273	56.5239	55.8371
124	0.772666	0.876522	0.879832	0.946025	0.919524	0.933137	1.02098	1.06772	1.12836	1.12811	1.1418	1.26146	1.22896	1.28873	1.39567	1.39223	1.40353	1.46892	1.47983	1.46754	1.55022	1.57244	1.57499	1.57921	1.57921
125	1.21756	1.21616	1.12778	1.20452	1.31455	1.23152	1.20581	1.14825	1.16621	1.16084	1.22482	1.35852	1.45559	1.49049	1.50328	1.52527	1.42937	1.35615	1.33876	1.34863	1.30013	1.29453	1.33687	1.29976	1.27744
126	39.4045	34.3678	35.4629	40.2733	43.5761	47.0954	51.7157	53.9776	57.0103	58.7684	58.5069	61.1104	62.0602	60.1361	63.1997	66.122	67.7501	67.0467	66.6271	68.8669	74.2535	79.9865	83.6518	83.6517	83.6517
127	1.29844	1.81764	2.08587	2.41215	2.25651	2.54942	2.63563	2.66367	3.00136	3.16194	3.17703	4.09818	4.2618	3.7111	2.89116	3.01274	3.98791	3.92031	4.02631	4.31585	4.64532	5.10504	5.35468	5.47477	5.4748
128	2.54746	2.85945	3.31901	3.52981	3.83044	3.9913	4.09998	4.13371	4.08773	4.3857	4.68565	5.27318	4.57526	4.36977	4.64241	5.47595	5.84148	5.91472	6.30799	6.9664	7.56583	7.89531	7.97553	7.97553	7.97555
129	2.5995	3.61808	4.48273	5.87196	7.90152	8.44238	9.53893	9.30743	9.101	8.27171	9.58453	11.2913	10.387	10.7357	9.2977	9.10188	8.63847	10.2097	12.1039	12.1492	12.7619	13.6055	12.3522	10.6089	9.50592
130	2.26371	2.22438	2.56302	3.00429	3.67771	4.18348	4.08736	4.20975	4.67856	4.72879	5.57723	5.4525	5.18839	5.23792	5.51525	5.60389	5.22787	4.95686	4.93978	5.74537	6.67767	7.84798	8.53661	8.02894	7.40186
131	0.988902	1.00063	1.05894	0.980021	0.801223	0.765743	0.749486	0.889665	0.977711	1.05365	1.15598	1.21959	1.26334	1.35253	1.4202	1.4935	1.48734	1.46204	1.41098	1.41671	1.39023	1.36254	1.3493	1.34868	1.34867
132	4.09098	5.72393	7.16962	7.60578	8.13019	8.85478	10.2529	10.7297	10.6845	11.7278	12.8995	13.8011	14.1295	14.5517	14.2457	14.5437	13.6429	15.4491	18.3726	19.8518	21.4375	22.4124	22.4124	22.4124	22.4124
133	0.247557	0.251563	0.297393	0.349347	0.416165	0.494941	0.55412	0.581786	0.634594	0.727976	0.711569	0.658145	0.677809	0.627984	0.656932	0.752545	0.792913	0.829734	0.880851	1.00435	1.17032	1.31979	1.38686	1.34468	1.32606
134	1.60597	1.47696	1.48668	1.426	1.38324	1.56348	1.80859	1.52477	1.6218	1.80736	2.04848	2.07581	2.15174	2.78756	3.30665	3.74185	4.08184	4.14734	4.11385	3.9965	3.9205	3.90532	3.84577	3.8151	3.81508
135	0.773763	0.79965	0.879438	1.06765	1.03399	1.15825	1.22112	1.20927	1.29417	1.28819	1.49574	1.51549	1.74106	1.6903	1.63374	1.74467	1.62598	1.61925	1.67385	1.83887	1.88673	1.97058	2.11001	2.10396	2.0988
136	13.8839	14.2865	15.4429	16.009	16.8602	18.1914	18.8071	20.528	22.967	22.4434	22.3836	21.784	21.9141	23.8196	22.4783	23.4965	24.7182	24.2679	25.3239	26.8599	29.148	30.9386	34.0069	31.5236	36.6685
137	1.00967	1.08632	1.05461	1.02554	1.22692	1.29636	1.38861	1.38251	1.45092	1.45508	1.55001	1.41778	1.60307	1.84755	2.06339	2.3575	2.80134	3.06217	3.18173	3.04966	2.97977	2.92244	2.92242	2.9224	2.92241
138	4.59087	4.43257	4.52839	4.47256	4.79691	5.08329	5.1305	5.712	5.58576	5.41615	5.95763	6.21917	6.48696	7.57693	7.6432	8.39282	8.2717	8.50595	10.0299	9.24175	9.6859	9.38656	9.1106	9.55181	9.55178
139	3.34724	3.28433	3.30298	3.6313	4.22578	4.22494	5.01973	5.09503	4.73782	5.06209	5.87454	6.21868	6.34746	6.26944	6.95338	7.15301	7.6519	7.42777	7.62439	8.35954	9.15387	8.75896	9.11792	9.11126	9.11126
140	1.5245	1.6601	1.982	2.04998	2.12893	2.58125	2.73176	2.91264	3.29191	3.22932	3.20392	3.1365	2.7711	2.6285	2.76884	2.87441	3.28744	3.42753	3.1891	3.11109	3.62137	3.59183	3.21259	3.07487	2.88154
141	24.0779	26.15	28.3891	30.4235	31.2938	32.797	34.0021	33.5567	35.5531	35.9951	38.1144	36.4026	36.873	33.591	34.8216	35.6626	40.2875	44.0053	43.9034	47.053	51.3922	51.866	48.1788	45.6642	41.6887
142	2.12004	2.0345	2.10871	2.43541	2.4421	2.43324	2.70031	2.87883	2.941	2.72591	2.91119	3.27563	3.4682	3.08186	3.58259	4.00705	4.03707	3.85796	4.10155	3.76983	4.03508	3.9324	4.69317	4.9702	5.89907
143	1.21976	1.39705	1.58814	1.78886	1.80804	1.81622	1.83535	1.97659	2.12864	2.30859	2.35633	2.28572	2.37812	2.432	2.56755	2.67221	2.72743	2.81272	2.86534	2.84875	2.84018	2.8277	2.8277	2.82771	2.82774
144	3.9399	4.41238	4.90761	5.16398	5.07331	5.01708	5.24221	5.09058	4.7462	4.44071	4.0543	3.91062	3.79016	4.00511	3.86912	3.89282	4.22505	5.24798	5.41938	5.16645	4.84726	4.35145	4.45848	4.84231	5.08943
145	4.72196	5.25086	6.34219	7.81477	8.4265	8.57615	9.46978	10.2538	9.94456	8.6264	8.8376	10.1026	9.72628	10.3474	12.0493	11.9007	14.8853	17.3824	19.5291	20.2375	18.8572	19.0661	19.0422	20.4843	20.6704
146	1.88273	2.45884	2.69508	2.85469	3.37233	2.90417	3.47374	3.32291	3.42127	3.56057	3.69538	3.65194	4.24979	4.60715	4.54194	4.08319	4.06797	4.20089	4.33741	4.75166	5.48905	6.29749	6.48896	6.54221	6.75362
147	0.986648	1.34627	1.56748	1.78224	1.99338	2.23769	2.22859	2.26378	2.073	1.99858	2.03025	2.25049	2.19419	2.33674	2.11637	2.01149	2.14125	2.48074	2.63761	3.12361	3.65624	3.68143	3.70915	3.83765	3.89166
148	2.24094	2.33657	2.53431	2.66294	2.59458	2.53333	2.76636	2.6692	2.72863	2.74614	3.08051	2.99673	2.99113	3.12815	3.21393	3.28835	3.36949	2.98044	2.91601	3.23002	3.74187	3.78103	4.25237	4.43433	4.5681
149	1.20453	1.30227	1.55597	1.63498	1.83496	2.28363	2.95698	2.80643	3.11222	2.69004	3.12737	3.16554	2.42512	2.52077	2.43342	2.68477	2.72678	2.87818	3.49732	4.21498	4.42616	4.68749	4.43634	4.47064	4.65126
150	0.857174	0.875389	0.954388	1.02043	1.03431	1.03097	0.99019	0.941882	1.02088	0.990957	1.12682	1.21176	1.24581	1.29784	1.38766	1.6069	1.76337	1.76909	1.8362	1.83824	1.88263	1.99941	2.03103	1.99932	1.99932
151	2.41216	2.18568	2.02231	2.04098	1.96163	1.87552	2.09745	1.9605	2.12672	2.37139	2.52815	2.4962	2.60628	2.9165	3.03502	3.17282	3.2074	3.2425	3.5838	3.93834	3.73436	3.80525	3.989	3.8632	3.71336
152	3.36352	3.36249	3.55514	3.72144	3.58083	3.67888	4.18342	4.1016	4.35904	3.9606	3.99493	4.443	4.46925	5.1353	5.31832	4.732	4.69263	4.39937	4.46952	4.80759	5.21383	5.86342	6.25183	6.58111	6.54904
153	1.54478	1.51315	1.37946	1.46563	1.61305	1.73507	1.65425	1.83661	2.07928	2.26416	2.73814	3.01597	3.04573	2.93503	2.80659	3.19096	3.83917	3.85356	3.95659	3.91819	4.43011	4.71872	4.6113	4.56637	4.59211
154	1.04835	1.19933	1.28248	1.44014	1.54902	1.68444	1.76259	1.95543	2.15454	2.23372	2.27237	2.42124	2.22057	1.96929	2.09017	2.25272	2.46225	2.66418	2.67848	2.73141	3.10694	3.66203	4.21922	4.8736	5.4067
155	53.8889	51.8701	49.6208	47.6187	49.85	49.6517	50.3259	50.0292	48.8068	51.7075	53.198	52.3989	50.6526	54.0975	52.2003	49.5765	51.2691	51.5039	53.6844	55.2301	53.8374	54.3966	55.6281	51.077	55.5824
156	2.97457	3.3819	4.04599	4.3418	4.41938	4.59554	4.55469	4.43327	4.74217	4.72023	4.99505	5.33871	5.80476	5.93963	7.33352	6.88793	6.92673	7.14014	7.40039	7.96967	7.52509	7.46919	7.62156	8.09254	8.13087
157	1.2288	1.26664	1.17934	1.04255	1.01897	0.982817	1.00836	0.968319	0.903703	0.902814	0.892451	0.908579	0.867506	0.868088	0.829744	0.793011	0.879596	1.04634	1.06569	1.0663	1.0646	1.11405	1.17536	1.16742	1.11341
158	4.18846	3.18241	3.03989	2.70565	2.62255	2.50891	2.63182	2.77476	3.20145	3.50738	2.6445	2.26883	2.31093	2.36028	2.60044	2.87767	2.87799	2.88819	2.834	2.76076	2.76077	2.76077	2.76077	2.76077	2.76076
159	3.24257	3.37911	3.15317	3.37623	3.63394	3.4252	3.82334	3.80879	4.24341	4.19507	4.39762	4.75562	5.1002	5.23273	5.10816	5.75245	5.8554	6.77294	6.95435	6.8747	6.78992	6.71816	6.71816	6.71819	6.7182
160	1.95631	1.6376	1.40702	1.2279	1.21746	1.243	1.20593	1.33101	1.44306	1.50148	1.54182	1.56961	1.49291	1.52536	1.55297	1.58961	1.56743	1.4502	1.49727	1.45288	1.4555	1.45957	1.44636	1.40552	1.39684
161	1.00849	1.23236	1.14013	1.10037	1.09524	1.00866	1.00652	0.94484	0.825748	0.888337	0.911235	0.92012	0.976849	1.03136	1.06481	1.13249	1.17223	1.16328	1.18877	1.18542	1.20513	1.19874	1.19736	1.19737	1.19737
162	2.03406	2.00179	1.99156	1.81642	1.8495	1.76581	1.80481	1.7357	1.86967	2.03269	2.02285	1.91917	1.89148	1.76772	1.80802	1.96905	1.95696	2.05954	2.2151	2.5217	2.57774	2.69361	2.74444	2.77958	2.75011
163	24.9468	25.6987	23.9429	22.406	22.3215	21.0041	21.2768	20.168	20.6765	21.1408	22.6403	21.9755	23.4691	23.4831	24.1547	27.7024	24.3159	26.9341	29.6312	33.2001	32.0932	31.9862	31.9861	31.9861	31.9861
164	1.86743	1.62419	1.61032	1.29067	1.23045	1.46051	1.40836	1.28273	1.26328	1.21803	1.22872	1.20031	1.29297	1.23089	1.25032	1.28434	1.38028	1.34513	1.28362	1.28013	1.32735	1.31403	1.26415	1.22942	1.22187
