# Supplementary material for: Effects of visual inputs on neural dynamics for coding of location and running speed in medial entorhinal cortex
Source: eLife. 2020 Dec 10;9:e62500. doi: 10.7554/eLife.62500 (PMC7773338; doi:10.7554/eLife.62500)
Supplement: Figure 7—source data 1. [file elife-62500-fig7-data1.xlsx]

## Sheet: mrv_lightVSdark
Mean resultant length	condition
0.545957	light
0.714689	light
0.940919	light
0.775731	light
0.875493	light
0.992384	light
0.144917	light
0.705756	light
0.692823	light
0.667663	light
0.734405	light
0.53214	light
0.945513	light
0.7312	light
0.772375	light
0.735153	light
0.762885	light
0.820107	light
0.861387	light
0.617795	light
0.976926	light
0.845763	light
0.540439	light
0.646547	light
0.7313	light
0.484789	light
0.873384	light
0.584161	light
0.688645	light
0.585575	light
0.569126	light
0.512672	light
0.473236	light
0.591332	light
0.775001	light
0.504786	light
0.401859	light
0.927915	light
0.34798	light
0.86909	light
0.646633	light
0.19433	light
0.755334	light
0.495732	light
0.411189	light
0.506701	light
0.691761	light
0.344608	light
0.512933	light
0.520692	light
0.775731	light
0.873144	light
0.992384	light
0.760105	light
0.783552	light
0.791237	light
0.407303	light
0.510949	light
0.563736	light
0.627739	light
0.521317	light
0.517853	light
0.688171	light
0.567537	light
0.475616	light
0.55063	light
0.607404	light
0.642433	dark
0.495583	dark
0.814536	dark
0.247564	dark
0.863544	dark
0.99059	dark
0.531886	dark
0.688284	dark
0.704576	dark
0.623784	dark
0.693657	dark
0.484403	dark
0.919603	dark
0.684242	dark
0.671433	dark
0.502397	dark
0.69484	dark
0.752997	dark
0.843098	dark
0.601084	dark
0.927053	dark
0.819236	dark
0.465913	dark
0.646932	dark
0.763424	dark
0.583508	dark
0.82576	dark
0.43286	dark
0.229597	dark
0.564248	dark
0.586159	dark
0.330635	dark
0.577098	dark
0.465852	dark
0.492291	dark
0.198437	dark
0.547979	dark
0.972803	dark
0.610025	dark
0.865005	dark
0.594805	dark
0.728089	dark
0.775873	dark
0.556359	dark
0.636625	dark
0.494435	dark
0.721869	dark
0.512898	dark
0.055969	dark
0.28149	dark
0.190263	dark
0.863544	dark
0.990553	dark
0.738379	dark
0.640072	dark
0.249223	dark
0.538547	dark
0.613614	dark
0.709128	dark
0.44261	dark
0.558298	dark
0.479426	dark
0.6179	dark
0.521388	dark
0.555562	dark
0.584739	dark
0.518461	dark
